# Supplementary material for: Ranking species based on sensitivity to perturbations under non-equilibrium community dynamics
Source: bioRxiv or medRxiv preprint supplement (doi:10.1101/2022.07.23.501258), 2022-07-23
Supplement: Supplementary file [file media-1.pdf]

# Supporting Information

## Ranking species based on sensitivity to perturbations under non-equilibrium community dynamics

Lucas P. Medeiros<sup>1</sup>, Stefano Allesina<sup>2,3</sup>, Vasilis Dakos<sup>4</sup>,  
George Sugihara<sup>5</sup> and Serguei Saavedra<sup>1</sup>

<sup>1</sup>Department of Civil and Environmental Engineering, Massachusetts Institute of Technology,  
Cambridge, MA, USA

<sup>2</sup> Department of Ecology & Evolution, University of Chicago, Chicago, IL, USA

<sup>3</sup> Northwestern Institute on Complex Systems, Northwestern University, Evanston, IL, USA

<sup>4</sup> Institut des Sciences de l'Evolution de Montpellier, Université de Montpellier, Montpellier, France

<sup>5</sup> Scripps Institution of Oceanography, University of California San Diego, La Jolla, CA, USA

## Contents

|           |                                                                                                                |           |
|-----------|----------------------------------------------------------------------------------------------------------------|-----------|
| <b>1</b>  | <b>Derivation of the dynamics of small perturbations</b>                                                       | <b>2</b>  |
| <b>2</b>  | <b>Derivation of analytical expected sensitivity</b>                                                           | <b>2</b>  |
| <b>3</b>  | <b>Synthetic time series from population dynamics models</b>                                                   | <b>4</b>  |
| <b>4</b>  | <b>Perturbation analyses</b>                                                                                   | <b>6</b>  |
| <b>5</b>  | <b>Inference of Jacobian matrix with the S-map</b>                                                             | <b>6</b>  |
| <b>6</b>  | <b>Analyses with short and noisy synthetic time series</b>                                                     | <b>7</b>  |
| <b>7</b>  | <b>Forecast analyses with empirical time series</b>                                                            | <b>8</b>  |
| <b>8</b>  | <b>Forecast analyses with synthetic time series</b>                                                            | <b>9</b>  |
| <b>9</b>  | <b>Leading eigenvector and direction of greatest perturbation expansion under equilibrium dynamics</b>         | <b>10</b> |
| <b>10</b> | <b>Leading Lyapunov vector and direction of greatest perturbation expansion under non-equilibrium dynamics</b> | <b>12</b> |
| <b>11</b> | <b>From direction of greatest perturbation expansion to ranking species sensitivities</b>                      | <b>13</b> |
| <b>12</b> | <b>Connection between expected sensitivity and eigenvector approaches</b>                                      | <b>14</b> |
| <b>13</b> | <b>Illustrations with Lotka-Volterra dynamics at equilibrium</b>                                               | <b>15</b> |

# 1 Derivation of the dynamics of small perturbations

In this section, we provide a derivation of the linear dynamics of small perturbations, which is the foundation of our approaches to rank species sensitivities to perturbations. Let us consider the most general form of a population dynamics model for a given species  $i$  within a community with  $S$  species (Case, 2000):

$$\frac{dN_i}{dt} = f_i(\mathbf{N}), \quad (\text{S1})$$

where  $N_i$  is the abundance of species  $i$ ,  $\mathbf{N} = [N_1, \dots, N_S]^\top$  is the vector of abundances of all species, and  $f_i$  ( $f_i: \mathbb{R}^S \rightarrow \mathbb{R}$ ) is the function describing how the growth rate of species  $i$  depends on the abundances of all species. Note that  $f_i$  also depends on a set of parameters, which we consider to be fixed over time. We can write equation (S1) for all species in the community as  $\frac{d\mathbf{N}}{dt} = \mathbf{f}(\mathbf{N})$ , where  $\frac{d\mathbf{N}}{dt} = [\frac{dN_1}{dt}, \dots, \frac{dN_S}{dt}]^\top$  and  $\mathbf{f}: \mathbb{R}^S \rightarrow \mathbb{R}^S$ . See below (Section 3) for some examples of population dynamics models of this form.

In this study, we are interested in ranking species according to their sensitivity to perturbations, that is, how much their abundance trajectories are expected to change after some time following a small random wiggle on abundances. Then, let us consider a random pulse perturbation  $\mathbf{p}$  that changes  $\mathbf{N}$  into  $\tilde{\mathbf{N}}$  (i.e.,  $\tilde{\mathbf{N}} = \mathbf{N} + \mathbf{p}$ ). Now, we can write the Taylor expansion of  $\frac{d\tilde{\mathbf{N}}}{dt}$  around  $\mathbf{N}$  (Strogatz, 2018):

$$\frac{d\tilde{\mathbf{N}}}{dt} = \mathbf{f}(\mathbf{N}) + \left. \frac{\partial \mathbf{f}}{\partial \tilde{\mathbf{N}}} \right|_{\tilde{\mathbf{N}}=\mathbf{N}} \cdot (\tilde{\mathbf{N}} - \mathbf{N}) + O(\mathbf{p}^\top \mathbf{p}), \quad (\text{S2})$$

where  $\left. \frac{\partial \mathbf{f}}{\partial \tilde{\mathbf{N}}} \right|_{\tilde{\mathbf{N}}=\mathbf{N}} = \mathbf{J}$  is the Jacobian matrix of partial derivatives with  $j_{ij} = \frac{\partial f_i}{\partial N_j}$ . If  $\mathbf{p}$  is small, we can approximate its dynamics by taking just the linear term (i.e., ignoring higher-order terms):

$$\begin{aligned} \frac{d\tilde{\mathbf{N}}}{dt} &= \mathbf{f}(\mathbf{N}) + \left. \frac{\partial \mathbf{f}}{\partial \tilde{\mathbf{N}}} \right|_{\tilde{\mathbf{N}}=\mathbf{N}} \cdot (\tilde{\mathbf{N}} - \mathbf{N}) \\ \frac{d\mathbf{N}}{dt} + \frac{d\mathbf{p}}{dt} &= \frac{d\mathbf{N}}{dt} + \mathbf{J}|_{\tilde{\mathbf{N}}=\mathbf{N}} \cdot \mathbf{p} \\ \frac{d\mathbf{p}}{dt} &= \mathbf{J}|_{\tilde{\mathbf{N}}=\mathbf{N}} \cdot \mathbf{p}. \end{aligned} \quad (\text{S3})$$

Thus, as it is known (Boyce *et al.*, 2017, Kuptsov & Parlitz, 2012, Mease *et al.*, 2003, Strogatz, 2018, Vallejo *et al.*, 2017), the dynamics of a small perturbation  $\mathbf{p}$  can be approximated by the linear equation above called the tangent dynamics of  $\frac{d\mathbf{N}}{dt}$ . Note that we have not assumed the existence of an equilibrium here (i.e.,  $\mathbf{N}^*$  for which  $\mathbf{f}(\mathbf{N}^*) = \mathbf{0}$ ) and, therefore, equation (S3) is valid irrespective of whether  $\mathbf{N}$  is close to equilibrium or not.

## 2 Derivation of analytical expected sensitivity

Here we derive the expected value ( $\mathbb{E}(s_i)$ ; Box 1 in the main text) of the sensitivity  $s_i$  (equation (1) in the main text) of species  $i$  to small perturbations ( $\mathbf{p}$ ) affecting species abundances ( $\mathbf{N}$ ). We assume that  $\mathbf{p}(t)$  follows a distribution with mean zero and covariance matrix  $\Sigma_t$ . We

assume a distribution with mean zero because unbiased perturbations are the most uninformative way to consider how perturbations may impact a community. In most of our perturbation analyses, we assume that  $\mathbf{p}(t)$  follows a multivariate normal distribution (i.e.,  $\mathbf{p}(t) \sim \mathcal{N}(\mathbf{0}, \boldsymbol{\Sigma}_t)$ ), but this assumption is not necessary for the derivation below. The linearized dynamics of a small perturbation is given by  $\frac{d\mathbf{p}}{dt} = \mathbf{J}\mathbf{p}$  (see *Section 1*) (Boyce *et al.*, 2017, Eckmann & Ruelle, 1985, Mease *et al.*, 2003, Strogatz, 2018). We can obtain the solution for this linear system as  $\mathbf{p}(t+k) = e^{\mathbf{J}k}\mathbf{p}(t)$ , where  $e^{\mathbf{A}} = \sum_{i=1}^{\infty} \frac{1}{i!}\mathbf{A}^i$  is the exponential of matrix  $\mathbf{A}$  (Arnoldi *et al.*, 2018, Boyce *et al.*, 2017). By defining  $\mathbf{M} = e^{\mathbf{J}k}$ , we can compute the expected value of  $\mathbf{p}(t+k)$ :

$$\begin{aligned}\mathbb{E}[\mathbf{p}(t+k)] &= \mathbb{E}[\mathbf{M}\mathbf{p}(t)] \\ &= \mathbf{M}\mathbb{E}[\mathbf{p}(t)] \\ &= \mathbf{0}.\end{aligned}\tag{S4}$$

Thus,  $\mathbf{p}(t+k)$  also follows a distribution with mean zero. In the special case where  $\mathbf{p}(t)$  follows a normal distribution,  $\mathbf{p}(t+k)$  also follows a normal distribution because  $\mathbf{M}\mathbf{p}(t)$  is a weighted sum of normal distributions.

Because  $p_i(t)$  and  $p_i(t+k)$  have mean zero, the sensitivity of species  $i$  can be approximated by the ratio of the variance of  $p_i(t+k)$  and the variance of  $p_i(t)$ :

$$\langle s_i \rangle = \frac{\frac{1}{n} \sum_{j=1}^n p_i^{(j)}(t+k)^2}{\frac{1}{n} \sum_{j=1}^n p_i^{(j)}(t)^2} = \frac{\text{Var}[p_i(t+k)]}{\text{Var}[p_i(t)]},\tag{S5}$$

where  $\text{Var}[p_i(t)] = \sigma_{i,t}^2$  is the  $i$ th diagonal element of  $\boldsymbol{\Sigma}_t$ . Assuming that  $\sigma_{i,t}^2$  is the same for every species  $i$ , we can ignore it for the purpose of ranking species sensitivities and focus only on  $\text{Var}[p_i(t+k)]$ . We can obtain  $\text{Var}[p_i(t+k)]$  by computing the covariance matrix of  $\mathbf{p}(t+k)$ :

$$\begin{aligned}\boldsymbol{\Sigma}_{t+k} &= \mathbb{E}[\mathbf{p}(t+k)\mathbf{p}(t+k)^\top] \\ &= \mathbb{E}[(\mathbf{M}\mathbf{p}(t))(\mathbf{M}\mathbf{p}(t))^\top] \\ &= \mathbf{M}\mathbb{E}[\mathbf{p}(t)\mathbf{p}(t)^\top]\mathbf{M}^\top \\ &= \mathbf{M}\boldsymbol{\Sigma}_t\mathbf{M}^\top.\end{aligned}\tag{S6}$$

Therefore, we define the expected sensitivity of species  $i$  at time  $t$  as:  $\mathbb{E}(s_i) = \text{Var}[p_i(t+k)] = \sigma_{i,t+k}^2$ , where  $\sigma_{i,t+k}^2$  is the  $i$ th diagonal element of  $\boldsymbol{\Sigma}_{t+k}$ . Note that we can normalize  $\mathbb{E}(s_i)$  by dividing it by  $\sum_{i=1}^S \sigma_{i,t+k}^2$ , which has been shown to correspond to the expected magnitude of  $\mathbf{p}(t+k)$  (i.e.,  $\mathbb{E}[\|\mathbf{p}(t+k)\|^2]$ ) (Arnoldi *et al.*, 2018). Although this normalization does not change the order of  $\mathbb{E}(s_i)$  values, it allows us to interpret the normalized  $\mathbb{E}(s_i)$  as the relative contribution of species  $i$  to the expected magnitude of  $\mathbf{p}(t+k)$ .

In addition to knowing  $\mathbf{J}$ , knowledge of  $\boldsymbol{\Sigma}_t$  and  $k$  is required to compute  $\mathbb{E}(s_i)$ . In our main set of perturbation analyses, we compute  $\mathbb{E}(s_i)$  using the true value of  $k$  used to evolve perturbed abundances but do not use the true value of  $\boldsymbol{\Sigma}_t$ . Specifically, we set  $\boldsymbol{\Sigma}_t = \mathbf{I}$ , where  $\mathbf{I}$  is the identity

matrix. We test the robustness of the expected sensitivity ranking under uncertainty in  $k$  and  $\Sigma_t$  in three different ways. First, we compute  $\mathbb{E}(s_i)$  using  $\Sigma_t = \mathbf{I}$  when  $\sigma_{i,t}^2$  varies over time and across species (i.e., normally distributed perturbations with a variance proportional to relative species abundances; Fig. S10). Second, we compute  $\mathbb{E}(s_i)$  using  $k = 1$  when  $k$  varies over time (i.e.,  $k$  inversely proportional to the time scale of the dynamics; Fig. S13). Third, we compute  $\mathbb{E}(s_i)$  as described above for our main set of analyses but add 100% of normally distributed noise to  $\Sigma_t$  and  $k$  at each point in time (Fig. S14).

### 3 Synthetic time series from population dynamics models

To test whether expected sensitivities ( $\mathbb{E}(s_i)$ ; Box 1 in the main text) and species alignments with the leading eigenvector ( $|\mathbf{v}_{1i}|$ ; Box 2 in the main text) can accurately rank species sensitivities to perturbations ( $\langle s_i \rangle$ , equation (2) in the main text), we perform perturbation analyses using synthetic time series. We generate synthetic time series using five different population dynamics models with the generic form:  $\frac{d\mathbf{N}}{dt} = \mathbf{f}(\mathbf{N})$ , where  $\mathbf{f}: \mathbb{R}^S \rightarrow \mathbb{R}^S$  is a nonlinear function. Here, we present the equations, parameter values and references for each model.

The first model contains two species and depicts the interactions between a predator (species 1) and its prey (species 2), producing a limit cycle (Yodzis, 1989) (Fig. S5):

$$\begin{aligned}\frac{dN_1}{dt} &= kN_1 \left( \frac{aN_2^2}{1 + ahN_2^2} \right) - dN_1 \\ \frac{dN_2}{dt} &= rN_2 \left( 1 - \frac{N_2}{K} \right) - N_1 \left( \frac{aN_2^2}{1 + ahN_2^2} \right),\end{aligned}\tag{S7}$$

where  $k = 0.5$ ,  $a = 0.002$ ,  $h = 4$ ,  $d = 0.1$ ,  $r = 0.5$ , and  $K = 100$ .

The second model contains three species and depicts a food chain with a primary producer (species 1), a primary consumer (species 2), and a secondary consumer (species 3), producing chaotic dynamics (Hastings & Powell, 1991, Upadhyay, 2000) (Fig. 1 in the main text and S5):

$$\begin{aligned}\frac{dN_1}{dt} &= rN_1 \left( 1 - \frac{N_1}{K} \right) - \frac{a_1 N_1 N_2}{1 + b_1 N_1} \\ \frac{dN_2}{dt} &= -sN_2 + hN_1 N_2 - \frac{a_2 N_2 N_3}{1 + b_2 N_2} \\ \frac{dN_3}{dt} &= -lN_3 + nN_2 N_3,\end{aligned}\tag{S8}$$

where  $r = 4.3$ ,  $K = 50$ ,  $a_1 = 0.1$ ,  $b_1 = 0.1$ ,  $a_2 = 0.1$ ,  $b_2 = 0.1$ ,  $s = 1$ ,  $h = 0.05$ ,  $l = 1$ , and  $n = 0.03$ .

The third and fourth models have the general form of the classic Lotka-Volterra model (Case, 2000):

$$\frac{dN_i}{dt} = N_i \left( r_i + \sum_{j=1}^S a_{ij} N_j \right)\tag{S9}$$

63 where  $r_i$  is an element of the vector  $\mathbf{r}$  representing the intrinsic growth rate of species  $i$  and  $a_{ij}$  is  
64 an element of the interaction matrix  $\mathbf{A}$  representing the interaction effect of species  $j$  on species  
65  $i$ . The third model contains three species ( $S = 3$ ) and produces chaotic dynamics between two  
66 prey and one predator (Gilpin, 1979) (Fig. S5) with the following values for  $r_i$  and  $a_{ij}$ :

$$\mathbf{r} = \begin{bmatrix} 1 \\ 1 \\ -1 \end{bmatrix}, \mathbf{A} = \begin{bmatrix} -0.1 & -0.1 & -1 \\ -0.15 & -0.1 & -0.1 \\ 0.5 & 0.05 & 0 \end{bmatrix}$$

67 The fourth model contains four competitor species ( $S = 4$ ) and also produces chaotic dynamics  
68 (Vano *et al.*, 2006) (Fig. S5) with the following values for  $r_i$  and  $a_{ij}$ :

$$\mathbf{r} = \begin{bmatrix} 1 \\ 0.72 \\ 1.53 \\ 1.27 \end{bmatrix}, \mathbf{A} = \begin{bmatrix} -1 & -1.09 & -1.52 & 0 \\ 0 & -1 & -0.44 & -1.36 \\ -2.33 & 0 & -1 & -0.47 \\ -1.21 & -0.51 & -0.35 & -1 \end{bmatrix}$$

69 Finally, the fifth model depicts a 5-species food web with two secondary consumers (species  
70 1 and 2), two primary consumers (species 3 and 4), and one primary producer (species 5) also  
71 generating chaotic dynamics (Deyle *et al.*, 2016) (Fig. S5):

$$\begin{aligned} \frac{dN_1}{dt} &= \nu_1 \lambda_1 \frac{N_1 N_3}{N_3 + N_3^*} - \nu_1 N_1 \\ \frac{dN_2}{dt} &= \nu_2 \lambda_2 \frac{N_2 N_4}{N_4 + N_4^*} - \nu_2 N_2 \\ \frac{dN_3}{dt} &= \mu_1 \kappa_1 \frac{N_3 N_5}{N_5 + N_5^*} - \nu_1 \lambda_1 \frac{N_1 N_3}{N_3 + N_3^*} - \mu_1 N_3 \\ \frac{dN_4}{dt} &= \mu_2 \kappa_2 \frac{N_4 N_5}{N_5 + N_5^*} - \nu_2 \lambda_2 \frac{N_2 N_4}{N_4 + N_4^*} - \mu_2 N_4 \\ \frac{dN_5}{dt} &= N_5 \left(1 - \frac{N_5}{K}\right) - \mu_1 \kappa_1 \frac{N_3 N_5}{N_5 + N_5^*} - \mu_2 \kappa_2 \frac{N_4 N_5}{N_5 + N_5^*}, \end{aligned} \quad (\text{S10})$$

72 where  $\nu_1 = 0.1$ ,  $\nu_2 = 0.07$ ,  $\lambda_1 = 3.2$ ,  $\lambda_2 = 2.9$ ,  $N_3^* = 0.5$ ,  $N_4^* = 0.5$ ,  $\mu_1 = 0.15$ ,  $\mu_2 = 0.15$ ,  
73  $\kappa_1 = 2.5$ ,  $\kappa_2 = 2$ ,  $N_5^* = 0.3$ , and  $K = 1.2$ .

74 For each model, we numerically integrate the dynamics using a Runge-Kutta method with a  
75 time step of 0.05 and obtain a time series with 10,000 points. Then, we sample equidistant points  
76 obtaining a final multivariate time series with 500 points ( $\{\mathbf{N}(t)\}$ ,  $t = 1, \dots, 500$ ). Note that with  
77 this protocol we obtain time series that fully sample the attractor of each model and have a size  
78 similar to the empirical time series used here (Fig. S5). Also note that by sampling equidistant  
79 points we test the robustness of the S-map to infer  $\mathbb{E}(s_i)$  and  $|\mathbf{v}_{1i}|$  under the typical low sampling  
80 frequency of empirical time series.

## 81 4 Perturbation analyses

82 For each synthetic time series, we perform random perturbations on abundances to compute  
 83 species sensitivities ( $\langle s_i \rangle$ ; equation (2) in the main text). We apply  $n = 300$  random pulse  
 84 perturbations  $\mathbf{p}$  to the abundance vector  $\mathbf{N}$  at each point in time:  $\tilde{\mathbf{N}} = \mathbf{N} + \mathbf{p}$ . We perform these  
 85 perturbations in three different ways. First, we assume perturbations are normally distributed  
 86 around  $\mathbf{N}$  and use  $p_i(t) \sim \mathcal{N}(\mu = 0, \sigma^2 = r^2)$  (Fig. 1C, D in the main text). Second, we  
 87 assume perturbations are uniformly distributed around  $\mathbf{N}$  and apply  $\mathbf{p}(t)$  such that  $\tilde{\mathbf{N}}$  is uniformly  
 88 distributed inside a hypersphere of radius  $r$  centered in  $\mathbf{N}$ . Third, we assume normally distributed  
 89 perturbations with a variance proportional to relative species abundances, such that:  $p_i(t) \sim$   
 90  $\mathcal{N}(\mu = 0, \sigma^2 = N'_i(t)r^2)$ , where  $N'_i(t) = \frac{N_i(t)}{\sum_{i=1}^S N_i(t)}$ . Note that in this last scenario we relax  
 91 our assumption that the variance of  $p_i(t)$  is fixed over time and equal for every species. For all  
 92 types of perturbation, we set  $r$  to be 15% of the mean standard deviation of species abundances:  
 93  $r = 0.15 \frac{1}{S} \sum_{i=1}^S \sigma_{N_i}$ , where  $\sigma_{N_i}$  is the standard deviation of  $N_i$  for the whole time series. The  
 94 results for normally distributed perturbations are presented in the main text, whereas the results  
 95 for the other perturbation types are shown in Figs. S9 and S10.

96 After applying perturbations, we numerically integrate model  $\mathbf{f}$  for  $k$  time steps using each  
 97 perturbed abundance vector  $\tilde{\mathbf{N}}$  as well as the unperturbed abundance vector  $\mathbf{N}$  as initial condi-  
 98 tions. Then, we compute  $\langle s_i \rangle$  using the initial (i.e., time  $t$ ) and final (i.e., time  $t + k$ ) perturbed  
 99 and unperturbed abundances (equation (2) in the main text). Because  $\frac{d\mathbf{N}}{dt}$  (i.e., time scale) can  
 100 greatly vary across state space, impacting how perturbations grow over time, we set  $k$  to be  
 101 inversely proportional to the mean absolute percent change between  $N_i(t + 1)$  and  $N_i(t)$ . Specif-  
 102 ically, we use  $k = \left[ \frac{1}{S} \sum_{i=1}^S \left| \frac{N_i(t+1) - N_i(t)}{N_i(t)} \right| \right]^{-\frac{1}{2}}$ . Thus,  $k$  increases as the percent change decreases  
 103 and we use a square root to damp the large variability in time scale found for most models. We  
 104 also perform these analyses using a fixed value of  $k$  ( $k = 1$  or  $k = 3$ ) for all points in the time  
 105 series (Figs. S11 and S12). Note that  $k = 3$  can be considered a long time period for some  
 106 models, allowing us to test the robustness of our approaches for longer periods of time.

## 107 5 Inference of Jacobian matrix with the S-map

108 We perform the S-map using the rEDM package in R to sequentially infer the Jacobian matrix  
 109 ( $\mathbf{J}$ ) through time using only past time-series data in order to compute expected sensitivities ( $\mathbb{E}(s_i)$ )  
 110 and species alignments with the leading eigenvector ( $|\mathbf{v}_{1i}|$ ). The S-map is a locally weighted state-  
 111 space regression method that can be used to infer the time-varying Jacobian matrix of a dynamical  
 112 system (Cenci *et al.*, 2019, Deyle *et al.*, 2016, Sugihara, 1994). Given a time series ( $\{\mathbf{N}(t_k)\}$ ,  
 113  $k = 1, \dots, T$ ), we can fit a linear regression of the following form to each point:  $N_i(t_k + 1) = c_{i0} +$   
 114  $\sum_{j=1}^S c_{ij} N_j(t_k)$ . Note that  $c_{ij} = \frac{\partial N_i(t_k+1)}{\partial N_j(t_k)}$  is an approximation of the Jacobian element  $j_{ij}$  at time  
 115  $t_k$ . The S-map consists of performing this linear regression locally for a given target point  $\mathbf{N}(t^*)$   
 116 by giving a stronger weight to points that are closer to it in state space. This is done by finding a  
 117 solution for  $\mathbf{c}$  in  $\mathbf{b} = \mathbf{A}\mathbf{c}$ , where  $b_k = w_k N_i(t_k + 1)$ ,  $a_{kj} = w_k N_j(t_k)$ ,  $w_k = \exp \left[ -\theta \frac{\|\mathbf{N}(t_k) - \mathbf{N}(t^*)\|}{d} \right]$ ,

118 and  $\bar{d} = \frac{1}{T} \sum_{k=1}^T \|\mathbf{N}(t_k) - \mathbf{N}(t^*)\|$ . Thus,  $\mathbf{b} \in \mathbb{R}^T$  contains the abundances at  $t_k + 1$  weighted  
119 by the relative distance of each point to the target point,  $\mathbf{A} \in \mathbb{R}^{T \times (S+1)}$  is the weighted data  
120 matrix of abundances at  $t_k$ , and  $\mathbf{c} \in \mathbb{R}^{S+1}$  estimates the  $i$ th row of the Jacobian matrix at time  
121  $t_k$  as well as an intercept term. We obtain the solution for  $\mathbf{c}$  via singular value decomposition  
122 (Deyle *et al.*, 2016), which is equivalent to the ordinary least squares solution (Cenci *et al.*, 2019).  
123 Importantly, the parameter  $\theta$  tunes how strongly the regression is localized around the target  
124 point and is typically selected using leave-one-out cross-validation (LOOCV) (Cenci *et al.*, 2019).

125 For each of the five synthetic time series, we fit the S-map sequentially to infer  $\mathbf{J}$  for each  
126 point in time, which is then used to compute  $\mathbb{E}(s_i)$  and  $|\mathbf{v}_{1i}|$ . To do so, we assign half of the  
127 time series (i.e.,  $\{\mathbf{N}(t)\}$ ,  $t = 1, \dots, 250$ ) as a training set to select the optimal  $\theta$  ( $\hat{\theta}$ ) via LOOCV  
128 by using the S-map to forecast species abundances (Cenci *et al.*, 2019). Then, we use  $\hat{\theta}$  to fit the  
129 S-map over the whole training set and infer  $\mathbb{E}(s_i)$  and  $|\mathbf{v}_{1i}|$  at the last point in the training set  
130 (i.e.,  $t = 250$ ) to rank  $\langle s_i \rangle$  values (computed via the perturbation analyses). Next, we add a new  
131 point to the training set, remove its first point, and repeat the LOOCV and ranking procedures  
132 until the end of the time series. Note that we keep the size of the training set fixed after each  
133 update (e.g.,  $t = 2, \dots, 251$  for the first update), controlling for the effects of time series length  
134 on the performance of the S-map. Also note that we can only infer the coefficients of  $\mathbf{J}$  up to a  
135 constant (Cenci & Saavedra, 2019), so we only consider the direction of  $\mathbf{v}_1$  and the relative value  
136 of  $\lambda_1$  through time.

137 Recent improvements of the S-map have been developed to deal with observational and process  
138 noise as well as with communities with a large number of species (Cenci *et al.*, 2019, Chang *et al.*,  
139 2021). Here, we find that the classic S-map as described above (Deyle *et al.*, 2016, Sugihara,  
140 1994) already provides a very good inference of expected sensitivities ( $\mathbb{E}(s_i)$ ; Box 1 in the main  
141 text) and eigenvector alignments ( $|\mathbf{v}_{1i}|$ ; Box 2 in the main text). In addition to the performance  
142 shown in Fig. 3, we show that the classic S-map allows us to accurately predict the order of  
143 species sensitivities ( $\langle s_i \rangle$ ) when normalizing species abundances (Fig. S15), when using shorter  
144 time series (Fig. S16), when adding observational noise to the time series (Fig. S17), or when the  
145 model has a stochastic component (i.e., process noise; Fig. S18). Our analyses with short and  
146 noisy time series are described in the next section (see *Section 6*). We believe that combining  
147 our ranking approaches with recent developments of the S-map (Cenci *et al.*, 2019, Chang *et al.*,  
148 2021) to deal with large amounts of noise or with communities with a large number of species is  
149 an exciting direction for future research.

## 150 **6 Analyses with short and noisy synthetic time series**

151 In our analyses with synthetic time series reported in the main text, we infer the Jacobian  
152 matrix ( $\mathbf{J}$ ) and, therefore, expected sensitivities ( $\mathbb{E}(s_i)$ ) and eigenvector alignments ( $|\mathbf{v}_{1i}|$ ) using  
153 time series with 250 points and without noise. These conditions, however, are rarely observed  
154 in empirical time series, which are typically much shorter and contaminated with noise (Cenci

155 *et al.*, 2019, Sugihara, 1994). In this section, we describe additional analyses with short and noisy  
156 synthetic time series.

157 To test the robustness of our ranking approaches (i.e., using  $\mathbb{E}(s_i)$  or  $|\mathbf{v}_{1i}|$  to rank  $\langle s_i \rangle$  over  
158 time) with shorter time series, we perform the S-map using a smaller training set. Instead of  
159 using 250 points (e.g.,  $t = 1, \dots, 250$  in the first training set) as described in the previous section,  
160 we use only 100 points (e.g.,  $t = 1, \dots, 100$  in the first training set) to train the S-map and infer  
161  $\mathbb{E}(s_i)$  and  $|\mathbf{v}_{1i}|$  at the last point in the training set to predict species sensitivities ( $\langle s_i \rangle$ ). Fig. S16  
162 shows that our results remain similar to the results in Fig. 3B, which use 250 points.

163 We also verify the performance of our ranking approaches inferred with the S-map under  
164 scenarios of observational noise. To do so, we use the same synthetic time series and perturbation  
165 analyses as reported in the main text but add normally distributed noise to the time series used to  
166 train the S-map. That is, for each species  $i$  and time  $t$  in the training set, we transform  $N_i(t)$  into  
167  $N_i(t) + \mathcal{N}(\mu = 0, \sigma^2 = [\delta N_i(t)]^2)$ , where  $\delta = 0.1$  (i.e., 10% of observational noise). Then, we use  
168 the noisy time series to infer  $\mathbb{E}(s_i)$  and  $|\mathbf{v}_{1i}|$  with the S-map and predict the order of  $\langle s_i \rangle$  at each  
169 point in time. The middle column in Fig. S5 shows the attractors for each population dynamics  
170 model with observational noise. Fig. S17 shows that, although the mean rank correlation ( $\bar{\rho}$ )  
171 can decrease for some models, our results remain similar to the results in Fig. 3B, which do not  
172 contain noise.

173 We also perform analyses with synthetic time series with process noise. To do so, we generate  
174 synthetic time series using a modified version of our population dynamics models (equations  
175 (S7), (S8), (S9), and (S10)). In particular, we transform each deterministic population dynamics  
176 model  $\frac{d\mathbf{N}}{dt} = \mathbf{f}(\mathbf{N})$  into a model with a stochastic component:  $d\mathbf{N} = \mathbf{f}(\mathbf{N})dt + \mathbf{g}(\mathbf{N})dW$ , where  
177  $\mathbf{f}(\mathbf{N})$  is the original deterministic part,  $\mathbf{g}(\mathbf{N})$  is the stochastic part, and  $W$  is a Wiener process.  
178 We use the simplest form of stochasticity, which consists of independent process noise for each  
179 species. That is,  $\mathbf{g}(\mathbf{N})$  is a diagonal matrix with  $N_i\delta$  as the diagonal elements, where  $\delta = 0.03$ .  
180 We then use the stochastic version of the models to generate the synthetic time series but use  
181 the deterministic version (i.e.,  $\delta = 0$ ) to evolve perturbed points over time in our perturbation  
182 analyses (see *Section 4*). Finally, we inferred our ranking approaches with the S-map using the  
183 synthetic time series with process noise to predict the order of  $\langle s_i \rangle$  over time. The right column  
184 in Fig. S5 shows the attractors for each population dynamics model with process noise. Fig. S18  
185 shows that, although the mean rank correlation ( $\bar{\rho}$ ) can decrease for some models, our results  
186 remain similar to the results in Fig. 3B.

## 187 7 Forecast analyses with empirical time series

188 We apply our ranking approaches to two empirical time series. Both time series contain  
189 four interacting variables (hereafter species) and have been shown to exhibit non-equilibrium  
190 dynamics for long periods of time (Benincà *et al.*, 2015, 2009). The first time series has 251  
191 points and reports the percentage of cover of barnacles, mussels, crustose algae, and bare rock



192 in a pristine rocky intertidal site sampled monthly for 20 years (Benincà *et al.*, 2015) (Fig.  
 193 4A in the main text). The second time series has 794 points and reports the abundance of  
 194 picocyanobacteria, nanoflagellates, rotifers, and calanoid copepods in an experimental mesocosm  
 195 sampled twice a week for 7 years (Benincà *et al.*, 2009) (Fig. S21). Because both time series  
 196 report species abundances on the same scale and unit, we do not normalize species abundances  
 197 before performing the S-map in order to preserve properties of the Jacobian matrix (e.g., sign of  
 198 Jacobian coefficients (Song & Saavedra, 2021); but see Fig. S25).

199 For each time series, we test the hypothesis that the order of species sensitivities ( $\mathbb{E}(s_i)$ )  
 200 and species alignments with the leading eigenvector ( $|\mathbf{v}_{1i}|$ ) should predict the order of species  
 201 standardized forecast errors ( $\epsilon_i$ ; equation (4) in the main text). To do so, we fit the S-map to  
 202 compute both rankings and use a Long Short-Term Memory (LSTM) neural network (James  
 203 *et al.*, 2021) to forecast species abundances. Specifically, for each time series, we assign 70%  
 204 of the data as the training set and sequentially infer the Jacobian matrix with the S-map by  
 205 moving the training set forward while keeping its size fixed as described in the previous section.  
 206 In addition, we independently train the LSTM neural network on the training set and forecast  
 207 the abundances of all species for  $\tau = 3$  steps ahead (Cenci *et al.*, 2020). Note that we normalize  
 208 species abundances to mean zero and unit standard deviation before training the LSTM neural  
 209 network. Then, we move the training set forward keeping its size fixed, fit the S-map and train the  
 210 LSTM neural network in the new training set, and forecast abundances for  $\tau = 3$  steps ahead until  
 211 we reach the end of the time series. Thus, for each time  $t$  in the test set (i.e., last 30% of points in  
 212 the time series), we obtain  $\mathbb{E}(s_i)$ ,  $|\mathbf{v}_{1i}|$  and  $\epsilon_i$  for each species and compute the rank correlation  $\rho$   
 213 between them. Note that neither the S-map nor the LSTM neural network use information from  
 214 abundances outside the current training set for inference and forecasting, respectively. Finally,  
 215 we perform a randomization test to verify whether the mean rank correlation over the test set ( $\bar{\rho}$ )  
 216 is significantly greater than zero. For each empirical time series and for each ranking approach,  
 217 we shuffle  $\epsilon_i$  values across species for each point in the test set and compute  $\bar{\rho}$  1,000 times to  
 218 obtain a  $p$ -value. We also perform these analyses using  $\tau = 2$  (Fig. S22) as well as using 60%  
 219 and 50% of points in the training set (Figs. S23 and S24).

## 220 8 Forecast analyses with synthetic time series

221 In the previous section, we describe our analyses using empirical time series to test the hy-  
 222 pothesis that species showing higher forecast errors ( $\epsilon_i$ ) at a given time are also more sensitive to  
 223 perturbations (i.e., have a higher value of  $\mathbb{E}(s_i)$  or  $|\mathbf{v}_{1i}|$ ). Here, we describe similar analyses using  
 224 the five synthetic time series generated from population dynamics models (see *Section 3*). In these  
 225 analyses, we compute an average forecast error ( $\bar{\epsilon}_i$ ) for each species by trying to forecast species  
 226 abundances with the LSTM neural network under perturbations (Cenci *et al.*, 2020, James *et al.*,  
 227 2021). First, we separate a given synthetic time series into a training set (first half of the time  
 228 series) and a test set (second half of the time series). Then, we add 10% of observational noise  
 229 to the training set (see *Section 6*) and use it to infer the Jacobian matrix with the S-map and

230 to forecast species abundances with the LSTM at the last point in the training set. Following  
 231 the analyses of the previous section, we forecast species abundances for  $\tau = 3$  steps ahead and  
 232 then move the training set forward by keeping its size fixed and repeat the inference and forecast  
 233 procedures until the end of the time series. For each time  $t$  in the test set, we compute an average  
 234 forecast root-mean-square error (RMSE) under perturbations for each species  $i$  as:

$$\bar{\epsilon}_i = \frac{1}{n} \sum_{j=1}^n \sqrt{[\tilde{N}_i^{(j)}(t + \tau - 1) - \hat{N}_i(t + \tau - 1)]^2}, \quad (\text{S11})$$

235 where  $n$  is the number of perturbed abundances ( $n = 300$ ),  $\tilde{N}_i^{(j)}(t + \tau - 1)$  is the  $j$ th perturbed  
 236 abundance of species  $i$  at time  $t + \tau - 1$ , and  $\hat{N}_i(t + \tau - 1)$  is the forecast of the abundance of  
 237 species  $i$  at time  $t + \tau - 1$ . Thus, we compute the average forecast error of each species for  $n$   
 238 potential perturbed abundances that could have been observed at a given point in time. Note  
 239 that perturbed abundances are obtained from our perturbation analyses (see *Section 4*).

240 We then use the inferred expected sensitivity ( $\mathbb{E}(s_i)$ ) and eigenvector ( $|\mathbf{v}_{1i}|$ ) rankings as well  
 241 as our alternative indicators (i.e.,  $\Delta N_i(t)$  or  $-N_i(t)$ ) to predict the order of average forecast errors  
 242 ( $\bar{\epsilon}_i$ ) over the test set. Note that this analysis follows closely our analyses of predicting the order  
 243 of species sensitivities ( $\langle s_i \rangle$ ) described in the main text. Fig. S19 shows the results for these  
 244 analyses as the Spearman's rank correlation ( $\rho$ ) between a given ranking ( $\mathbb{E}(s_i)$ ,  $|\mathbf{v}_{1i}|$ ,  $\Delta N_i(t)$ , or  
 245  $-N_i(t)$ ) and  $\bar{\epsilon}_i$  over the test set. The figure shows that, for all models expected for the model with  
 246 4 competitor species,  $\mathbb{E}(s_i)$  and  $|\mathbf{v}_{1i}|$  show, on average, a positive rank correlation with  $\bar{\epsilon}_i$  (Fig.  
 247 S19). Furthermore, the figure shows that this is not the case for  $\Delta N_i(t)$  and  $-N_i(t)$  (Fig. S19).  
 248 Therefore, this analysis illustrates that species forecast errors can be related to our measures of  
 249 sensitivity to perturbations under synthetic time series.

## 250 **9 Leading eigenvector and direction of greatest perturbation ex-** 251 **pansion under equilibrium dynamics**

252 We now explain how the leading eigenvector of the Jacobian matrix  $\mathbf{J}$  (see *Section 1*) points  
 253 in the direction of greatest expansion of small perturbations under equilibrium dynamics. Under  
 254 equilibrium dynamics and for sufficiently small perturbations,  $\mathbf{J}$  evaluated at the equilibrium  $\mathbf{N}^*$   
 255 is constant. Thus, we can obtain the general solution of the linear differential equation (S3) as  
 256 (Boyce *et al.*, 2017, Strogatz, 2018):

$$\mathbf{p}(t + k) = \sum_{i=1}^S c_i e^{\lambda_i k} \mathbf{v}_i, \quad (\text{S12})$$

257 where  $\lambda_i$  is the  $i$ th eigenvalue of  $\mathbf{J}$  ( $\lambda_S \leq \dots \leq \lambda_1$ ) associated with eigenvector  $\mathbf{v}_i$ , and the  
 258 constants  $c_i$  depend on the initial condition  $\mathbf{p}(t) = \sum_{i=1}^S c_i \mathbf{v}_i$ . We use  $\lambda_i$  and  $\mathbf{v}_i$  to denote the  
 259 real parts of the  $i$ th eigenvalue and eigenvector, respectively. Under equilibrium dynamics,  $\lambda_i < 0$   
 260 for all  $i$  implies a stable equilibrium, whereas  $\lambda_i > 0$  for any  $i$  implies an unstable equilibrium

261 (Strogatz, 2018). Note that, without loss of generality, we can set  $t = 0$  for the initial condition.  
 262 Also note that the solution for  $\mathbf{p}(t + k)$  can only be described by equation (S12) if  $\mathbf{J}$  has  $S$   
 263 distinct eigenvalues and, therefore, a set of  $S$  linearly independent eigenvectors. We propose  
 264 that given a sufficient amount of time  $k$ ,  $e^{\lambda_1 k}$  will become much larger than subsequent terms  
 265 (i.e.,  $e^{\lambda_2 k}, \dots, e^{\lambda_S k}$ ) and, therefore, equation (S12) can be approximated using only the leading  
 266 eigenvalue and its associated leading eigenvector:

$$\mathbf{p}(t + k) \approx c_1 e^{\lambda_1 k} \mathbf{v}_1. \quad (\text{S13})$$

267 Therefore, after a sufficient time  $k$ , perturbed abundances  $\mathbf{p}$  will be located closely to the line  
 268 spanned by  $\mathbf{v}_1$ .

269 It is important to note that the time  $k$  required for  $c_1 e^{\lambda_1 k} \mathbf{v}_1$  to approximate  $\mathbf{p}(t + k)$  depends  
 270 on all eigenvalues and eigenvectors. For example, if  $\lambda_S < \dots < \lambda_2 < 0 < \lambda_1$  and eigenvectors are  
 271 orthogonal to each other, then the time  $k$  for  $c_1 e^{\lambda_1 k} \mathbf{v}_1$  to approximate  $\mathbf{p}(t + k)$  is expected to be  
 272 small (see first scenario in *Section 13* and Fig. S1). Importantly, this is the scenario we expect to  
 273 observe in chaotic non-equilibrium dynamical systems that typically have directions of expansion  
 274 (i.e., unstable manifold) and contraction (i.e., stable manifold) at each point along an attractor  
 275 (Eckmann & Ruelle, 1985, Strogatz, 2018). On the other hand, if more than one eigenvalue is  
 276 positive or if eigenvectors are not orthogonal, then the time  $k$  for  $c_1 e^{\lambda_1 k} \mathbf{v}_1$  to approximate  $\mathbf{p}(t + k)$   
 277 is expected to be large (see second scenario in *Section 13* and Fig. S2).

278 In addition, it is also important to consider the case of complex eigenvalues and eigenvectors.  
 279 In this case, the real solution approximated using only  $\lambda_1$  and  $\mathbf{v}_1$  is given by (Boyce *et al.*, 2017):

280

$$\mathbf{p}(t + k) \approx c_1 \mathbf{p}_1 + c_2 \mathbf{p}_2, \quad (\text{S14})$$

where  $c_1$  and  $c_2$  are constants and  $\mathbf{p}_1$  and  $\mathbf{p}_2$  are the two linearly independent real solutions given  
 by:

$$\begin{aligned} \mathbf{p}_1 &= e^{ak} [\mathbf{u} \cos(bk) - \mathbf{z} \sin(bk)] \\ \mathbf{p}_2 &= e^{ak} [\mathbf{u} \sin(bk) + \mathbf{z} \cos(bk)], \end{aligned} \quad (\text{S15})$$

281 where  $\lambda_1 = a + ib$ ,  $\lambda_2 = a - ib$  is the pair of leading complex eigenvalues and  $\mathbf{v}_1 = \mathbf{u} + i\mathbf{z}$ ,  
 282  $\mathbf{v}_2 = \mathbf{u} - i\mathbf{z}$  is the pair of leading complex eigenvectors. Thus, in this case the solution  $\mathbf{p}(t + k)$  is  
 283 oscillatory. However, we can see that if the imaginary parts of the leading eigenvalue and leading  
 284 eigenvector ( $b$  and  $\mathbf{z}$ ) are not too strong, then their real parts ( $a$  and  $\mathbf{u}$ ) still inform us about the  
 285 magnitude and direction of greatest expansion of perturbations, respectively (see third scenario  
 286 in *Section 13* and Fig. S3). Finally, we note that  $b$  (and therefore  $\mathbf{z}$ ) is zero for the majority  
 287 of points in three out of five synthetic time series that we analyze (predator-prey (2 sp): 47.7%;  
 288 food chain (3 sp): 69.1%; food web (3 sp): 81.6%; competitors (4 sp): 26.4%; and food web (5  
 289 sp): 95.2%). To keep a simple notation, we use  $\lambda_i$  and  $\mathbf{v}_i$  throughout the text to refer to the real

290 part of the  $i$ th eigenvalue and eigenvector, respectively.

## 291 **10 Leading Lyapunov vector and direction of greatest perturba-** 292 **tion expansion under non-equilibrium dynamics**

293 In this study, we focus on non-equilibrium attractors such as limit cycles or chaotic attractors  
294 (Fig. S5). By “non-equilibrium dynamics” we refer to trajectories of a deterministic dynamical  
295 system (e.g., population dynamics model) that do not settle to an equilibrium point. A large  
296 literature on nonlinear dynamics has shown that local Lyapunov exponents and their associated  
297 Lyapunov vectors determine how a (hyper)sphere of small perturbations at a given state  $\mathbf{N}$   
298 deforms into a (hyper)ellipsoid after sufficient time (Eckmann & Ruelle, 1985, Kuptsov & Parlitz,  
299 2012, Mease *et al.*, 2003, Strogatz, 2018, Vallejo *et al.*, 2017). Let  $l_i$  ( $l_S \leq \dots \leq l_1$ ) and  $\mathbf{w}_i$  denote  
300 the  $i$ th local Lyapunov exponent and vector, respectively. If at time  $t$  we apply  $S$  perturbations  
301 with a small norm  $\|\mathbf{p}_i(t)\| = \delta$  ( $i = 1, \dots, S$ ) in the directions of  $\mathbf{w}_i$  (i.e.,  $\frac{\mathbf{p}_i(t)}{\delta} = \mathbf{w}_i$ ), then after  
302 some time  $k$ ,  $\|\mathbf{p}_i(t+k)\| \approx \|\mathbf{p}_i(t)\|e^{l_i k}$  denotes the length of the  $i$ th principal axis of the ellipsoid  
303 (Kuptsov & Parlitz, 2012, Mease *et al.*, 2003, Strogatz, 2018, Vallejo *et al.*, 2017). As we have  
304 mentioned in *Section 1*, under non-equilibrium dynamics small perturbations evolve according to  
305  $\frac{d\mathbf{p}}{dt} = \mathbf{J}\mathbf{p}$ . If  $\mathbf{J}$  is constant through time, as is the case when it is evaluated at an equilibrium  
306 point, it has been shown that Lyapunov vectors ( $\mathbf{w}_1, \dots, \mathbf{w}_S$ ) are equivalent to the eigenvectors  
307 of  $\mathbf{J}$  ( $\mathbf{v}_1, \dots, \mathbf{v}_S$ ) and Lyapunov exponents ( $l_S \leq \dots \leq l_1$ ) are equivalent to the eigenvalues of  $\mathbf{J}$   
308 ( $\lambda_S \leq \dots \leq \lambda_1$ ) (Kuptsov & Parlitz, 2012, Mease *et al.*, 2003). Nevertheless, when  $\mathbf{J}$  is not constant  
309 through time, it is necessary to incorporate information on all  $\mathbf{J}$  matrices along a trajectory to  
310 estimate  $l_i$  and  $\mathbf{w}_i$ . The problem with this approach, however, is that it requires information  
311 beyond time  $t$  in order to detect the directions of perturbation expansion/contraction at time  $t$   
312 and therefore is not useful for real-world applications. Thus, the question is whether the leading  
313 eigenvector can be used as a proxy for the leading Lyapunov vector to detect the direction of  
314 greatest expansion of small perturbations under non-equilibrium dynamics.

315 Here we specify the conditions under which the leading eigenvector  $\mathbf{v}_1$  is a good approximation  
316 to the leading Lyapunov vector  $\mathbf{w}_1$ . On the one hand, we hypothesize that when the rate of change  
317 of the system ( $\frac{d\mathbf{N}}{dt}$ ) is large, the Jacobian matrix  $\mathbf{J}$  changes rapidly and  $\mathbf{v}_1$  approximates  $\mathbf{w}_1$  only  
318 for a small time  $k$ . Note that, under these circumstances, only a small amount of time is required  
319 for  $c_1 e^{\lambda_1 k} \mathbf{v}_1$  to approximate  $\mathbf{p}(t+k)$  (equation (S13)). On the other hand, we hypothesize that  
320 when  $\frac{d\mathbf{N}}{dt}$  is small,  $\mathbf{J}$  changes slowly and  $\mathbf{v}_1$  approximates  $\mathbf{w}_1$  for a larger time  $k$ . Note that,  
321 under this scenario, a larger amount of time is required for  $c_1 e^{\lambda_1 k} \mathbf{v}_1$  to approximate  $\mathbf{p}(t+k)$ .  
322 Therefore, the leading eigenvector must show a higher accuracy in detecting the direction of  
323 greatest perturbation expansion when the amount of time  $k$  for which perturbations evolve is  
324 inversely proportional to the current rate of change of the system. Note that we set  $k$  to be  
325 inversely proportional to the rate of change of the system in our main perturbation analyses (see  
326 *Section 4*; Fig. 3 in the main text), but also perform perturbation analyses using fixed values of

327  $k$  (see *Section 4*; Figs. S11 and S12).

328 To verify how well the leading eigenvector  $\mathbf{v}_1$  approximates the leading Lyapunov vector  $\mathbf{w}_1$ ,  
 329 we compute  $\mathbf{w}_1$  for all points in each time series generated by each of the five population dynamics  
 330 models used in this study (see *Section 3*). Although computing the complete set of Lyapunov  
 331 vectors is a more complicated procedure (Ginelli *et al.*, 2007, Kuptsov & Parlitz, 2012), computing  
 332 just  $\mathbf{w}_1$  (i.e., direction of greatest perturbation expansion) is straightforward (Vallejo *et al.*, 2017).  
 333 Specifically, we compute  $\mathbf{w}_1$  by applying a small perturbation  $\mathbf{p}$  at time  $t$  and evolving the original  
 334 dynamics ( $\frac{d\mathbf{N}}{dt} = \mathbf{f}(\mathbf{N})$ ) and the tangent dynamics ( $\frac{d\mathbf{p}}{dt} = \mathbf{J}\mathbf{p}$ ) simultaneously for  $k$  time steps.  
 335 Then,  $\mathbf{p}$  will rotate over time to the direction of  $\mathbf{w}_1$  while expanding at a rate given by the leading  
 336 Lyapunov exponent ( $l_1$ ) (Kuptsov & Parlitz, 2012, Mease *et al.*, 2003, Vallejo *et al.*, 2017). For  
 337 the convergence of  $\mathbf{p}$  to  $\mathbf{w}_1$  to be faster, we follow standard methods (Vallejo *et al.*, 2017) and  
 338 choose  $\mathbf{p}$  to be a vector with a small norm  $r$  in the direction of  $\mathbf{v}_1$ . Specifically  $\mathbf{p} = r \frac{\mathbf{v}_1}{\|\mathbf{v}_1\|}$ , where  
 339 we set  $r$  to be 5% of the mean standard deviation of species abundances:  $r = 0.05 \frac{1}{S} \sum_{i=1}^S \sigma_{N_i}$ .  
 340 For each point in time, we use the same value of  $k$  as used in our perturbation analyses (i.e.,  $k$  is  
 341 inversely proportional to the local rate of change of the dynamics as described in *Section 4*. The  
 342 leading Lyapunov vector at time  $t$  can then be estimated as  $\mathbf{w}_1 = \mathbf{p}(t+k)$ , whereas the leading  
 343 Lyapunov exponent can be calculated as  $l_1 = \frac{1}{k} \log \left( \frac{\|\mathbf{p}(t+k)\|}{\|\mathbf{p}(t)\|} \right)$ . To verify how aligned  $\mathbf{v}_1$  is with  
 344  $\mathbf{w}_1$ , we compute the absolute value of the cosine of the angle between  $\mathbf{v}_1$  and  $\mathbf{w}_1$  at each point  
 345 in time. Thus, if  $\mathbf{v}_1$  indeed points in the direction of  $\mathbf{w}_1$ , we expect that only the magnitude  
 346 and not the direction of  $\mathbf{p}$  will change after  $k$  time steps. In this case, the growth rate of the  
 347 magnitude of  $\mathbf{p}$  is given by  $l_1$ . To benchmark the observed alignment between  $\mathbf{v}_1$  and  $\mathbf{w}_1$ , we  
 348 repeat the procedure above but choose  $\mathbf{p}$  to be a vector with norm  $r$  and a random direction at  
 349 each point in time. We use this analysis to compare the alignment between  $\mathbf{v}_1$  and  $\mathbf{w}_1$  (expected  
 350 to be high) with the alignment of a randomly chosen vector  $\mathbf{p}(t)$  and  $\mathbf{p}(t+k)$  (expected to be  
 351 low). We find  $\mathbf{v}_1$  to be highly aligned with  $\mathbf{w}_1$  (i.e., absolute value of cosine close to 1) for all  
 352 five synthetic time series (left boxplots in Fig. S4). In contrast, when the initial perturbation  
 353 ( $\mathbf{p}(t)$ ) has a random direction instead of the direction of  $\mathbf{v}_1$ , we find it to be poorly aligned with  
 354  $\mathbf{p}(t+k)$  (right boxplots in Fig. S4).

## 355 11 From direction of greatest perturbation expansion to ranking 356 species sensitivities

357 Now, we show how we can rank species sensitivities based on the direction of greatest pertur-  
 358 bation expansion approximated by the leading eigenvector. We define the sensitivity of species  $i$   
 359 to a single perturbation  $\mathbf{p}$  from time  $t$  to  $t+k$  as the squared difference between its perturbed and  
 360 unperturbed abundance in relation to the initial squared difference caused by the perturbation  
 361 (equation (1) in the main text):

$$s_i = \frac{[\tilde{N}_i(t+k) - N_i(t+k)]^2}{[\tilde{N}_i(t) - N_i(t)]^2} = \frac{p_i(t+k)^2}{p_i(t)^2}. \quad (\text{S16})$$

Note that under equilibrium dynamics, we can just change  $N_i$  to  $N_i^*$  and the derivation below remains the same. Let us first consider the numerator of the equation above by substituting the approximated solution of the linearized dynamics (equation (S13)) into it:

$$\begin{aligned} p_i(t+k)^2 &\approx [c_1 e^{\lambda_1 k} \mathbf{v}_{1i}]^2 \\ &\approx c_1^2 e^{2\lambda_1 k} \mathbf{v}_{1i}^2, \end{aligned} \quad (\text{S17})$$

where  $\mathbf{v}_{1i}^2$  corresponds to the square of the  $i$ th element of  $\mathbf{v}_1$ . Thus,  $c_1^2 e^{2\lambda_1 k}$  represents the total amount of expansion, which depends on  $\lambda_1$ ,  $k$ , and  $c_1$  via the initial condition. Note, however, that this term is the same for every species  $i$ . Therefore, the values of  $p_i(t+k)^2$  across species can be ranked using  $|\mathbf{v}_{1i}|$ , which follows the same order as  $\mathbf{v}_{1i}^2$ . We use  $|\mathbf{v}_{1i}|$  instead of  $\mathbf{v}_{1i}^2$  because it has a clear geometric interpretation as the alignment of  $\mathbf{v}_1$  with the coordinate axis corresponding to species  $i$  in state space. That is, if  $\|\mathbf{v}_1\| = 1$ , then  $|\mathbf{v}_{1i}|$  is equivalent to the absolute value of the cosine of the angle  $\alpha_i$  between  $\mathbf{v}_1$  and  $\mathbf{e}_i$ :  $|\mathbf{v}_{1i}| = |\cos \alpha_i| = |\mathbf{v}_1 \mathbf{e}_i|$ , where  $\mathbf{e}_i$  is the  $i$ th standard basis vector.

So far, we have only considered species sensitivities to a single perturbation  $\mathbf{p}$ . We now consider multiple perturbations at time  $t$  ( $\mathbf{p}(t)$ ), which follow a given distribution with mean zero and covariance matrix  $\mathbf{\Sigma}_t$ . For a set of  $n$  randomly perturbed abundances, we can define the sensitivity of species  $i$  from time  $t$  to  $t+k$  as the average squared difference between a set of  $n$  randomly perturbed abundances and its unperturbed abundance in relation to the initial average squared difference (equation (2) in the main text):

$$\langle s_i \rangle = \frac{\frac{1}{n} \sum_{j=1}^n [\tilde{N}_i^{(j)}(t+k) - N_i(t+k)]^2}{\frac{1}{n} \sum_{j=1}^n [\tilde{N}_i^{(j)}(t) - N_i(t)]^2} = \frac{\frac{1}{n} \sum_{j=1}^n p_i^{(j)}(t+k)^2}{\frac{1}{n} \sum_{j=1}^n p_i^{(j)}(t)^2}. \quad (\text{S18})$$

By focusing on the numerator, we can see that  $\frac{1}{n} \sum_{j=1}^n p_i^{(j)}(t+k)^2 = \mathbb{E}[c_1^2 e^{2\lambda_1 k} \mathbf{v}_{1i}^2] = e^{2\lambda_1 k} \mathbf{v}_{1i}^2 \mathbb{E}[c_1^2]$ , since  $e^{2\lambda_1 k}$  and  $\mathbf{v}_{1i}^2$  are constants. The expectation  $\mathbb{E}[c_1^2]$  will depend on the distribution of initial conditions, but will affect the sensitivity of all species by the same amount. Finally, we note that because  $p_i(t)$  has mean zero, the denominator of equation (S18) is a constant given by the variance of  $p_i(t)$  (i.e., the  $i$ th diagonal element  $\sigma_{i,t}^2$  of  $\mathbf{\Sigma}_t$ ; Section 2). Thus, if  $\sigma_{i,t}^2$  is the same for every species  $i$ , the denominator of equation (S18) will not affect the order of  $\langle s_i \rangle$  values and we can use  $|\mathbf{v}_{1i}|$  to rank species sensitivities. However, we keep this denominator in our definition of  $\langle s_i \rangle$  to control for distinct variances across species in one of our perturbation analyses (see Section 4).

## 12 Connection between expected sensitivity and eigenvector approaches

Here, we show a connection between our measures of expected sensitivity ( $\mathbb{E}(s_i)$ ; Box 1 in the main text) and alignment with the leading eigenvector ( $|\mathbf{v}_{1i}|$ ; Box 2 in the main text) under

two simplifying assumptions. First, we assume that all species are affected by perturbations with the same variance and there is no covariance among species pairs (i.e., the covariance matrix of perturbations  $\Sigma_t$  is the identity matrix  $\mathbf{I}$ ). Second, we assume that the Jacobian matrix  $\mathbf{J}$  at time  $t$  is symmetric (i.e.,  $\mathbf{J} = \mathbf{J}^\top$ ). Although these assumptions may not be fulfilled in natural communities, they allow us to obtain a first insight into the connections between  $\mathbb{E}(s_i)$  and  $|\mathbf{v}_{1i}|$ . Using these assumptions, we can write the following equation for the covariance matrix of perturbations at time  $t + k$  (*Section 2*):

$$\begin{aligned}\Sigma_{t+k} &= e^{\mathbf{J}k} \Sigma_t e^{\mathbf{J}^\top k} \\ &= e^{\mathbf{J}k} e^{\mathbf{J}k} \\ &= e^{\mathbf{J}k + \mathbf{J}k} \\ &= e^{\mathbf{J}2k},\end{aligned}\tag{S19}$$

387 where  $e^{\mathbf{A}}$  is the exponential of a given matrix  $\mathbf{A}$  and we have used the fact that if  $\mathbf{A}$  and  $\mathbf{B}$   
388 commute then  $e^{\mathbf{A}}e^{\mathbf{B}} = e^{\mathbf{A}+\mathbf{B}}$ . Now, we can write the eigendecomposition of  $\Sigma_{t+k}$  as:

$$\Sigma_{t+k} = \mathbf{V}e^{\Lambda 2k}\mathbf{V}^\top,\tag{S20}$$

where  $\mathbf{V}$  is the matrix containing the eigenvectors of  $\mathbf{J}$  ( $\mathbf{v}_i$ ) as column vectors and  $\Lambda$  is the diagonal matrix containing the eigenvalues of  $\mathbf{J}$  ( $\lambda_i$ ). Note that we have used the property that  $\mathbf{A}$  and  $e^{\mathbf{A}}$  share the same eigenvectors and that if  $\lambda_i$  is an eigenvalue of  $\mathbf{A}$ , then  $e^{\lambda_i}$  is the corresponding eigenvalue of  $e^{\mathbf{A}}$ . The expected sensitivity of species  $i$  is defined as the  $i$ th diagonal element of  $\Sigma_{t+k}$  ( $\sigma_{i,t+k}^2$ ; *Section 2*), which gives us:

$$\begin{aligned}\mathbb{E}(s_i) &= \sigma_{i,t+k}^2 \\ &= \sum_{j=1}^S \mathbf{v}_{ji}^2 e^{\lambda_j 2k} \\ &\approx \mathbf{v}_{1i}^2 e^{\lambda_1 2k},\end{aligned}\tag{S21}$$

389 where  $\mathbf{v}_{ji}$  is the  $j$ th element of  $\mathbf{v}_i$  and in the last step we used the fact that, given a sufficient  
390 amount of time  $k$ ,  $e^{\lambda_1 2k}$  will become much larger than  $e^{\lambda_2 2k}, \dots, e^{\lambda_S 2k}$  and will dominate the  
391 expression. Thus, the order of  $\mathbb{E}(s_i)$  values will follow closely the order of  $|\mathbf{v}_{1i}|$  values under the  
392 assumptions considered here. Finally, note that the final expression in equation (S21) is very  
393 similar to what we obtained in equation (S17) as an explanation of how we can use  $|\mathbf{v}_{1i}|$  to rank  
394 species sensitivities to a given perturbation ( $s_i$ ).

### 395 **13 Illustrations with Lotka-Volterra dynamics at equilibrium**

396 To illustrate how expected sensitivities ( $\mathbb{E}(s_i)$ ; Box 1 in the main text) and alignments with  
397 the leading eigenvector ( $|\mathbf{v}_{1i}|$ ; Box 2 in the main text) are able to rank species according to their

398 sensitivity to perturbations ( $\langle s_i \rangle$ ), we use the classic Lotka-Volterra model (equation (S9)) under  
 399 equilibrium dynamics. For this model, the vector of species abundances at equilibrium is given  
 400 by:  $\mathbf{N}^* = -\mathbf{A}^{-1}\mathbf{r}$ . While the focus of our study is on non-equilibrium dynamics, our goal here is  
 401 simply to show the performance of these two proposed methods under three simple scenarios of  
 402 equilibrium dynamics. Our results for non-equilibrium dynamics are described in the main text.

403 We use three different scenarios of the Lotka-Volterra dynamics with  $S = 3$  species. For  
 404 all scenarios we choose a combination of  $\mathbf{r}$  and  $\mathbf{A}$  giving the following feasible (i.e., positive  
 405 abundances for all species) equilibrium:  $\mathbf{N}^* = [1, 1, 1]^\top$ . Note that for this feasible equilibrium,  
 406 the Jacobian matrix evaluated at  $\mathbf{N}^*$  is given by:  $\mathbf{J} = \text{diag}(\mathbf{N}^*)\mathbf{A} = \mathbf{A}$ . For each scenario, we  
 407 compute the eigenvalues ( $\lambda_i$ ) and eigenvectors ( $\mathbf{v}_i$ ) of  $\mathbf{J}$  as well as expected sensitivities ( $\mathbb{E}(s_i)$ )  
 408 using  $k = 0.1, 0.2, 0.3, 0.4$ , and  $0.5$ . We then perform 2,000 normally distributed perturbations  
 409  $\mathbf{p}$  to  $\mathbf{N}^*$  (i.e.,  $p_i \sim \mathcal{N}(\mu = 0, \sigma^2 = r^2)$  with  $r = 0.05$ ) and evolve each perturbed abundance over  
 410 time according to equation (S9) for  $k = 0.5$  time steps. Finally, we compute species sensitivities  
 411 ( $\langle s_i \rangle$ ) at  $t = 0.1, 0.2, 0.3, 0.4$ , and  $0.5$  using all perturbed abundances at those time points.

412 The first scenario (Fig. S1) consists of the following parameter values of the Lotka-Volterra  
 413 model:

$$\mathbf{r} = \begin{bmatrix} 1 \\ 1 \\ 1 \end{bmatrix}, \mathbf{A} = \begin{bmatrix} 1 & -2 & 0 \\ 0 & -1 & 0 \\ 0 & 2 & -3 \end{bmatrix}$$

414 The eigenvalues of  $\mathbf{J}$  show that the feasible equilibrium for this system is a saddle point:  $\lambda_1 = 1$   
 415 (unstable manifold),  $\lambda_2 = -1$ , and  $\lambda_3 = -3$  (stable manifolds). The order of expected sensitivities  
 416 is given by  $\mathbb{E}(s_3) < \mathbb{E}(s_2) < \mathbb{E}(s_1)$ , which corresponds exactly to the order of species sensitivities  
 417 ( $\langle s_i \rangle$ ) for all times (Fig. S1B, C). The order of eigenvector alignments is given by  $|\mathbf{v}_{13}|, |\mathbf{v}_{12}| < |\mathbf{v}_{11}|$   
 418 and corresponds closely to the order of species sensitivities, but cannot distinguish species 2 and  
 419 3 (Fig. S1B, C). Note that expected sensitivities depend on the time step  $k$ , whereas eigenvector  
 420 alignments do not.

421 The second scenario (Fig. S2) consists of the following parameter values:

$$\mathbf{r} = \begin{bmatrix} -4.5 \\ 17.5 \\ 7 \end{bmatrix}, \mathbf{A} = \begin{bmatrix} 4 & 0.5 & 0 \\ 0.5 & -10 & -8 \\ 0 & -8 & 1 \end{bmatrix}$$

422 The eigenvalues of  $\mathbf{J}$  show that the feasible equilibrium is again a saddle point:  $\lambda_1 = 5.2$ ,  $\lambda_2 =$   
 423  $4.0$  (unstable manifolds), and  $\lambda_3 = -14.2$  (stable manifold). However, this scenario is more  
 424 challenging than the previous one for our ranking approaches because there are two (instead  
 425 of one) directions of perturbation expansion. The order of expected sensitivities is given by  
 426  $\mathbb{E}(s_2) < \mathbb{E}(s_1) < \mathbb{E}(s_3)$ , which corresponds exactly to the order of species sensitivities from  $k = 0.2$   
 427 to  $k = 0.5$  (Fig. S2B, C). The order of eigenvector alignments is given by  $|\mathbf{v}_{11}| < |\mathbf{v}_{12}| < |\mathbf{v}_{13}|$   
 428 and provides a reasonable match to the order of species sensitivities (Fig. S2B, C).



429 Finally, the third scenario (Fig. S3) consists of the following parameter values:

$$\mathbf{r} = \begin{bmatrix} 5 \\ -1 \\ -7 \end{bmatrix}, \mathbf{A} = \begin{bmatrix} -4 & -3 & 2 \\ -2 & 1 & 2 \\ 5 & 2 & 0 \end{bmatrix}$$

430 For this scenario, the leading eigenvalue of  $\mathbf{J}$  is complex and therefore indicate oscillatory dy-  
431 namics:  $\lambda_1 = 2.0 + 0.7i$ ,  $\lambda_2 = 2.0 - 0.7i$ , and  $\lambda_3 = -7.0 + 0i$ . This scenario is also challenging  
432 for our ranking approaches due to this oscillatory behavior. Note, however, that the imaginary  
433 part of the leading eigenvalue is small compared to the real part. The order of expected sen-  
434 sitivities is given by  $\mathbb{E}(s_1) < \mathbb{E}(s_3) < \mathbb{E}(s_2)$ , which corresponds exactly to the order of species  
435 sensitivities from  $k = 0.3$  to  $k = 0.5$  (Fig. S3B, C). The order of eigenvector alignments is given  
436 by  $|\mathbf{v}_{13}| < |\mathbf{v}_{11}| < |\mathbf{v}_{12}|$  and provides a reasonable match to the order of species sensitivities (Fig.  
437 S3B, C).

## 438 References

- 439 Arnoldi, J.F., Bideault, A., Loreau, M. & Haegeman, B. (2018). How ecosystems recover from  
440 pulse perturbations: A theory of short-to long-term responses. *Journal of theoretical biology*,  
441 436, 79–92.
- 442 Benincà, E., Ballantine, B., Ellner, S.P. & Huisman, J. (2015). Species fluctuations sustained by  
443 a cyclic succession at the edge of chaos. *Proceedings of the National Academy of Sciences*, 112,  
444 6389–6394.
- 445 Benincà, E., Jöhnk, K.D., Heerkloss, R. & Huisman, J. (2009). Coupled predator–prey oscillations  
446 in a chaotic food web. *Ecology letters*, 12, 1367–1378.
- 447 Boyce, W.E., DiPrima, R.C. & Meade, D.B. (2017). *Elementary differential equations*. John  
448 Wiley & Sons.
- 449 Case, T. (2000). *An Illustrated Guide to Theoretical Ecology*. Oxford University Press, Oxford.
- 450 Cenci, S., Medeiros, L.P., Sugihara, G. & Saavedra, S. (2020). Assessing the predictability of  
451 nonlinear dynamics under smooth parameter changes. *Journal of the Royal Society Interface*,  
452 17, 20190627.
- 453 Cenci, S. & Saavedra, S. (2019). Non-parametric estimation of the structural stability of non-  
454 equilibrium community dynamics. *Nature Ecology & Evolution*, 3, 912–918.
- 455 Cenci, S., Sugihara, G. & Saavedra, S. (2019). Regularized s-map for inference and forecasting  
456 with noisy ecological time series. *Methods in Ecology and Evolution*, 10, 650–660.
- 457 Chang, C.W., Miki, T., Ushio, M., Ke, P.J., Lu, H.P., Shiah, F.K. & Hsieh, C.h. (2021). Re-  
458 constructing large interaction networks from empirical time series data. *Ecology Letters*, 24,  
459 2763–2774.
- 460 Deyle, E.R., May, R.M., Munch, S.B. & Sugihara, G. (2016). Tracking and forecasting ecosystem  
461 interactions in real time. *Proceedings of the Royal Society B: Biological Sciences*, 283, 20152258.
- 462 Eckmann, J.P. & Ruelle, D. (1985). Ergodic theory of chaos and strange attractors. *The theory*  
463 *of chaotic attractors*, pp. 273–312.
- 464 Gilpin, M.E. (1979). Spiral chaos in a predator-prey model. *The American Naturalist*, 113,  
465 306–308.
- 466 Ginelli, F., Poggi, P., Turchi, A., Chaté, H., Livi, R. & Politi, A. (2007). Characterizing dynamics  
467 with covariant lyapunov vectors. *Physical review letters*, 99, 130601.
- 468 Hastings, A. & Powell, T. (1991). Chaos in a three-species food chain. *Ecology*, 72, 896–903.
- 469 James, G., Witten, D., Hastie, T. & Tibshirani, R. (2021). *An introduction to statistical learning:*  
470 *with applications in R*. Springer.

- 471 Kuptsov, P.V. & Parlitz, U. (2012). Theory and computation of covariant lyapunov vectors.  
472 *Journal of nonlinear science*, 22, 727–762.
- 473 Mease, K., Bharadwaj, S. & Iravanchy, S. (2003). Timescale analysis for nonlinear dynamical  
474 systems. *Journal of guidance, control, and dynamics*, 26, 318–330.
- 475 Song, C. & Saavedra, S. (2021). Bridging parametric and nonparametric measures of species  
476 interactions unveils new insights of non-equilibrium dynamics. *Oikos*.
- 477 Strogatz, S.H. (2018). *Nonlinear dynamics and chaos: with applications to physics, biology,*  
478 *chemistry, and engineering*. CRC press.
- 479 Sugihara, G. (1994). Nonlinear forecasting for the classification of natural time series. *Philosoph-*  
480 *ical Transactions of the Royal Society of London. Series A: Physical and Engineering Sciences*,  
481 348, 477–495.
- 482 Upadhyay, R. (2000). Chaotic behaviour of population dynamic systems in ecology. *Mathematical*  
483 *and computer modelling*, 32, 1005–1015.
- 484 Vallejo, J.C., Sanjuan, M.A. & Sanjuán, M.A. (2017). *Predictability of chaotic dynamics*. Springer.
- 485 Vano, J., Wildenberg, J., Anderson, M., Noel, J. & Sprott, J. (2006). Chaos in low-dimensional  
486 lotka–volterra models of competition. *Nonlinearity*, 19, 2391.
- 487 Yodzis, P. (1989). *Introduction to theoretical ecology*. HarperCollins College Division.

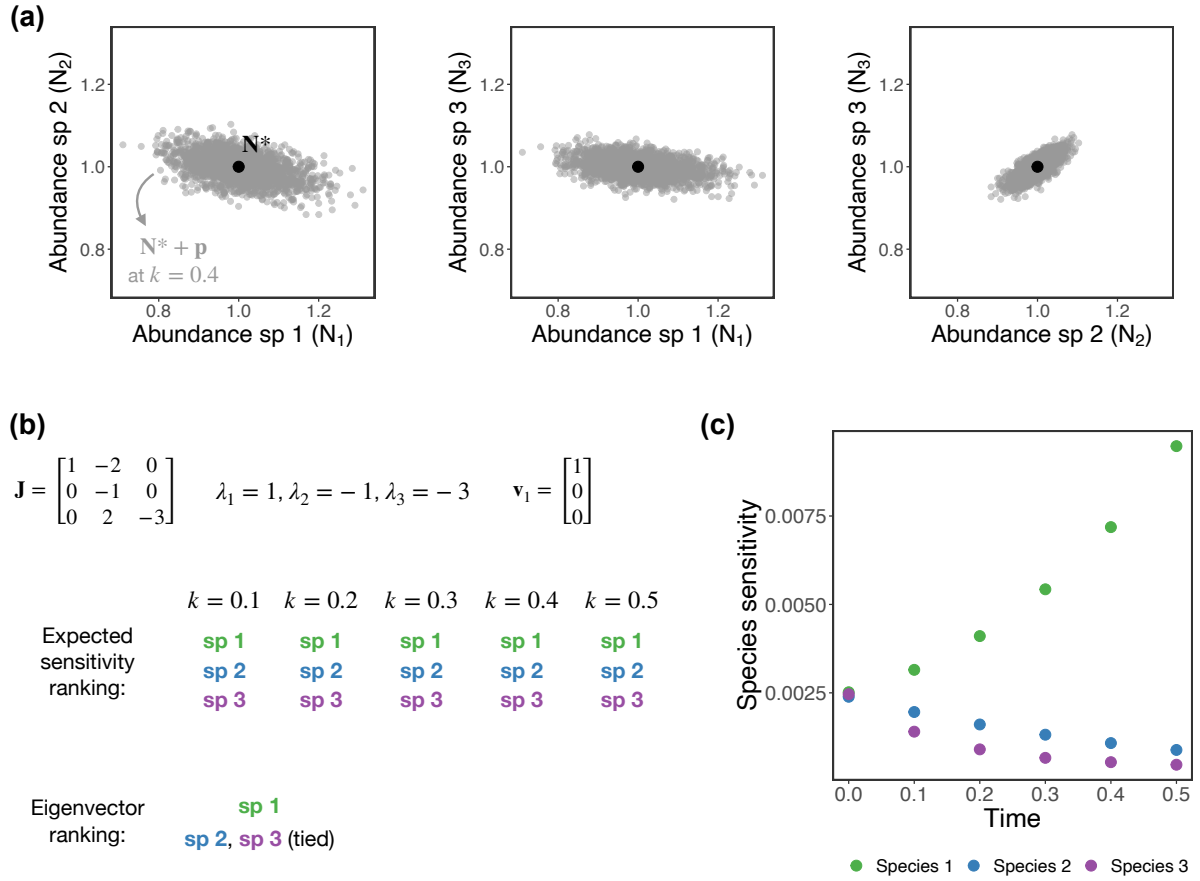

**Figure S1.** First scenario of Lotka-Volterra dynamics at equilibrium (see *Section 13*) showing how expected sensitivities ( $\mathbb{E}(s_i)$ ) and alignments with the leading eigenvector ( $|\mathbf{v}_{1i}|$ ) can rank species sensitivities to perturbations ( $\langle s_i \rangle$ ). (a) Perturbed abundances ( $\tilde{\mathbf{N}} = \mathbf{N}^* + \mathbf{p}$ ; 2,000 gray points) at time  $k = 0.4$  projected onto the planes of species 1 and 2 (left), species 1 and 3 (middle), and species 2 and 3 (right). (b) Jacobian matrix ( $\mathbf{J}$ ) and its eigenvalues ( $\lambda_i$ ) and leading eigenvector ( $\mathbf{v}_1$ ) for this Lotka-Volterra system (top). The order of expected sensitivities (computed using different values of  $k$ ) and eigenvector alignments (bottom). (c) Species sensitivities computed using the perturbed abundances (gray points in (a)) at different points in time (i.e., for different values of  $k$ ). In this scenario, the expected sensitivity ranking is more accurate than the eigenvector ranking.

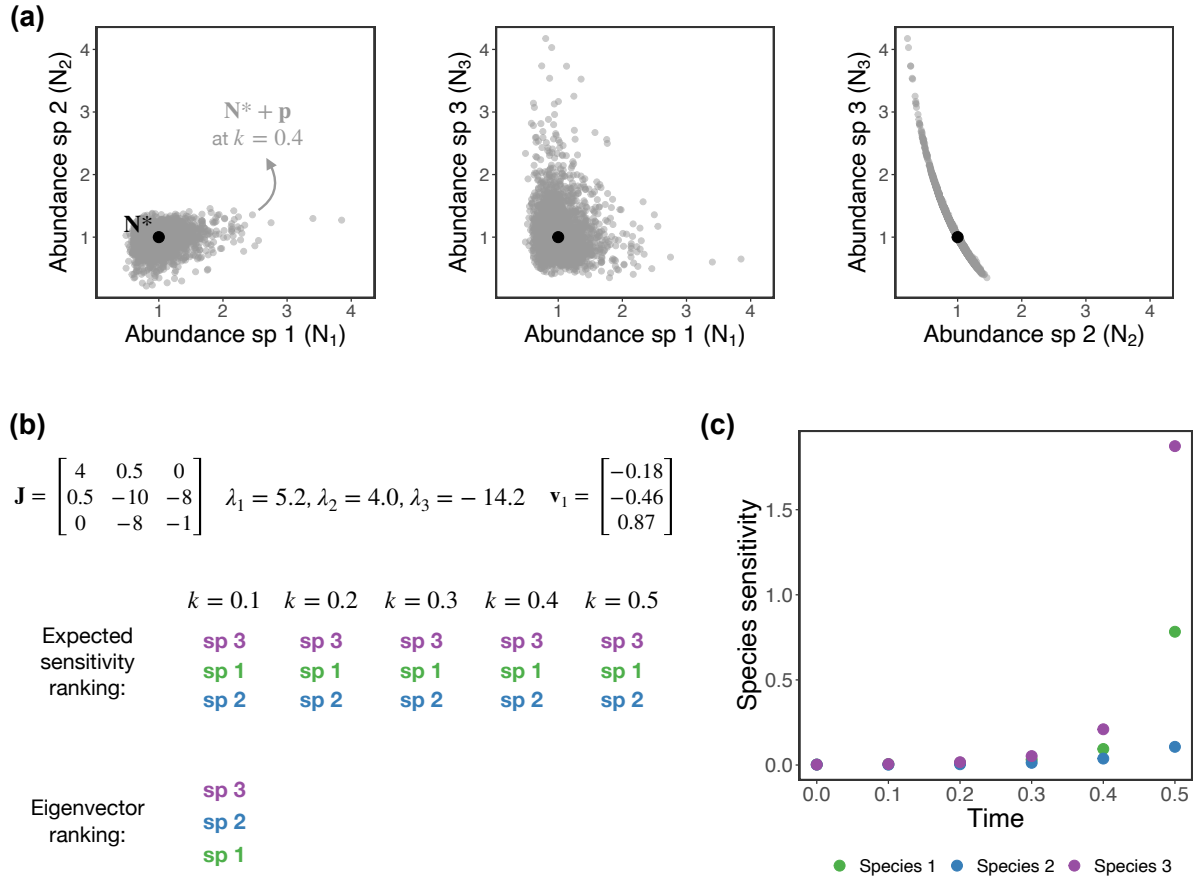

**Figure S2.** Second scenario of Lotka-Volterra dynamics at equilibrium (see *Section 13*) showing how expected sensitivities ( $\mathbb{E}(s_i)$ ) and alignments with the leading eigenvector ( $|\mathbf{v}_{1i}|$ ) can rank species sensitivities to perturbations ( $\langle s_i \rangle$ ). (a) Perturbed abundances ( $\tilde{\mathbf{N}} = \mathbf{N}^* + \mathbf{p}$ ; 2,000 gray points) at time  $k = 0.4$  projected onto the planes of species 1 and 2 (left), species 1 and 3 (middle), and species 2 and 3 (right). (b) Jacobian matrix ( $\mathbf{J}$ ) and its eigenvalues ( $\lambda_i$ ) and leading eigenvector ( $\mathbf{v}_1$ ) for this Lotka-Volterra system (top). The order of expected sensitivities (computed using different values of  $k$ ) and eigenvector alignments (bottom). (c) Species sensitivities computed using the perturbed abundances (gray points in (a)) at different points in time (i.e., for different values of  $k$ ). In this scenario, the expected sensitivity ranking is more accurate than the eigenvector ranking.

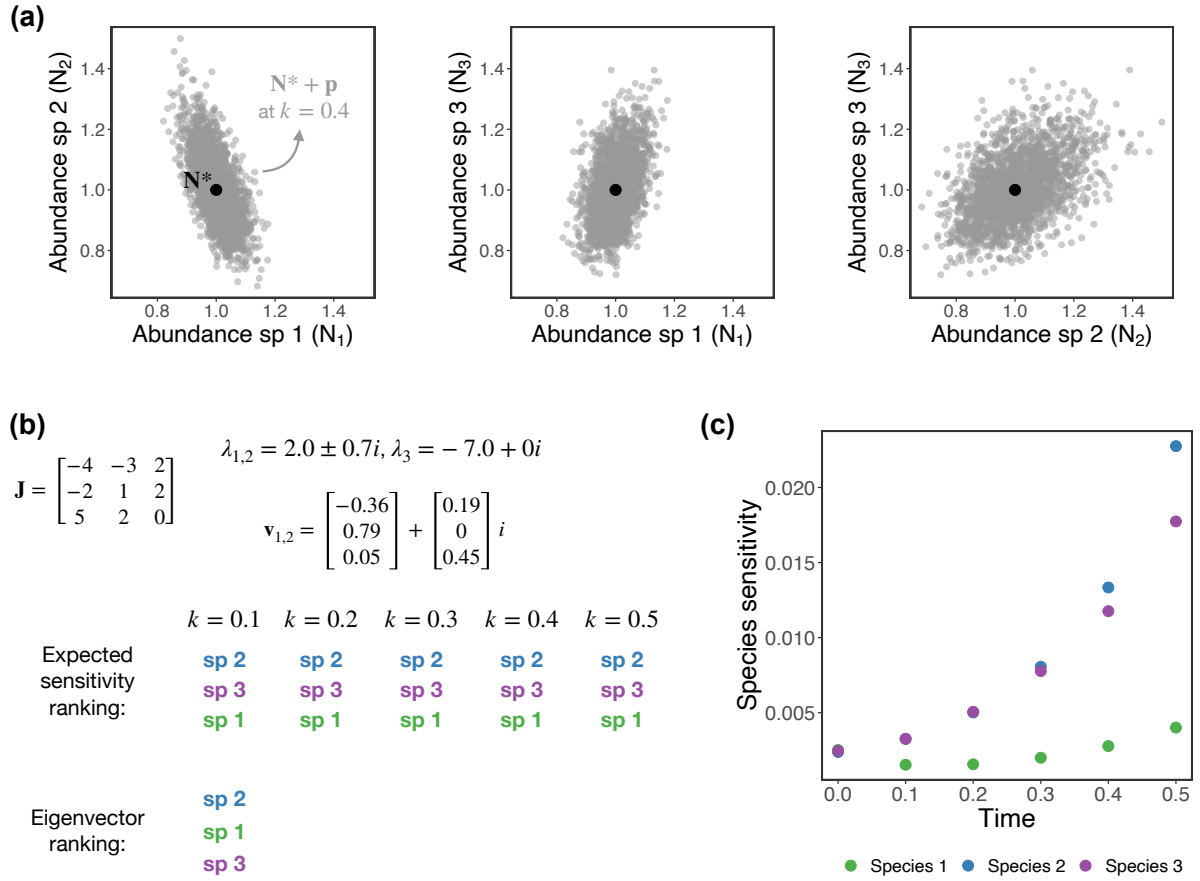

**Figure S3.** Third scenario of Lotka-Volterra dynamics at equilibrium (see *Section 13*) showing how expected sensitivities ( $\mathbb{E}(s_i)$ ) and alignments with the leading eigenvector ( $|\mathbf{v}_{1i}|$ ) can rank species sensitivities to perturbations ( $\langle s_i \rangle$ ). (a) Perturbed abundances ( $\tilde{\mathbf{N}} = \mathbf{N}^* + \mathbf{p}$ ; 2,000 gray points) at time  $k = 0.4$  projected onto the planes of species 1 and 2 (left), species 1 and 3 (middle), and species 2 and 3 (right). (b) Jacobian matrix ( $\mathbf{J}$ ) and its eigenvalues ( $\lambda_i$ ) and leading eigenvector ( $\mathbf{v}_1$ ) for this Lotka-Volterra system (top). The order of expected sensitivities (computed using different values of  $k$ ) and eigenvector alignments (bottom). (c) Species sensitivities computed using the perturbed abundances (gray points in (a)) at different points in time (i.e., for different values of  $k$ ). In this scenario, the expected sensitivity ranking is more accurate than the eigenvector ranking.

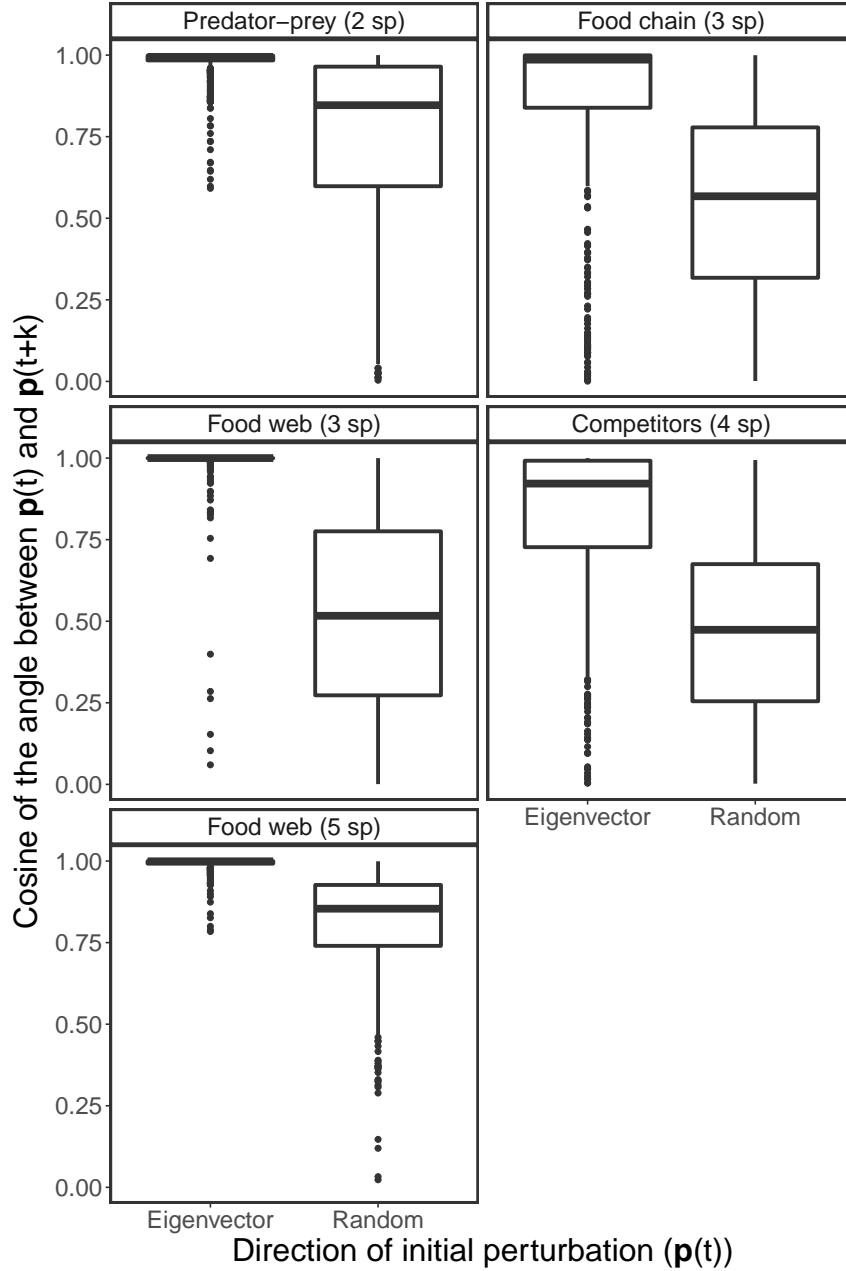

**Figure S4.** Alignments (i.e., absolute value of cosine of the angle) between the initial ( $\mathbf{p}(t)$ ) and final ( $\mathbf{p}(t+k)$ ) perturbation vector for two directions of  $\mathbf{p}(t)$  for the five population dynamics models (see *Section 10*). Boxplots on the left correspond to  $\mathbf{p}(t)$  in the direction of the leading eigenvector ( $\mathbf{v}_1$ ) whereas boxplots on the right correspond to  $\mathbf{p}(t)$  in a random direction. Note that  $\mathbf{p}(t+k)$  converges to the leading Lyapunov vector ( $\mathbf{w}_1$ ) when  $\mathbf{p}(t)$  is in the direction of  $\mathbf{v}_1$ . The figure shows that  $\mathbf{v}_1$  is on average much more aligned with  $\mathbf{w}_1$  (left boxplots) than what is expected at random (right boxplots).

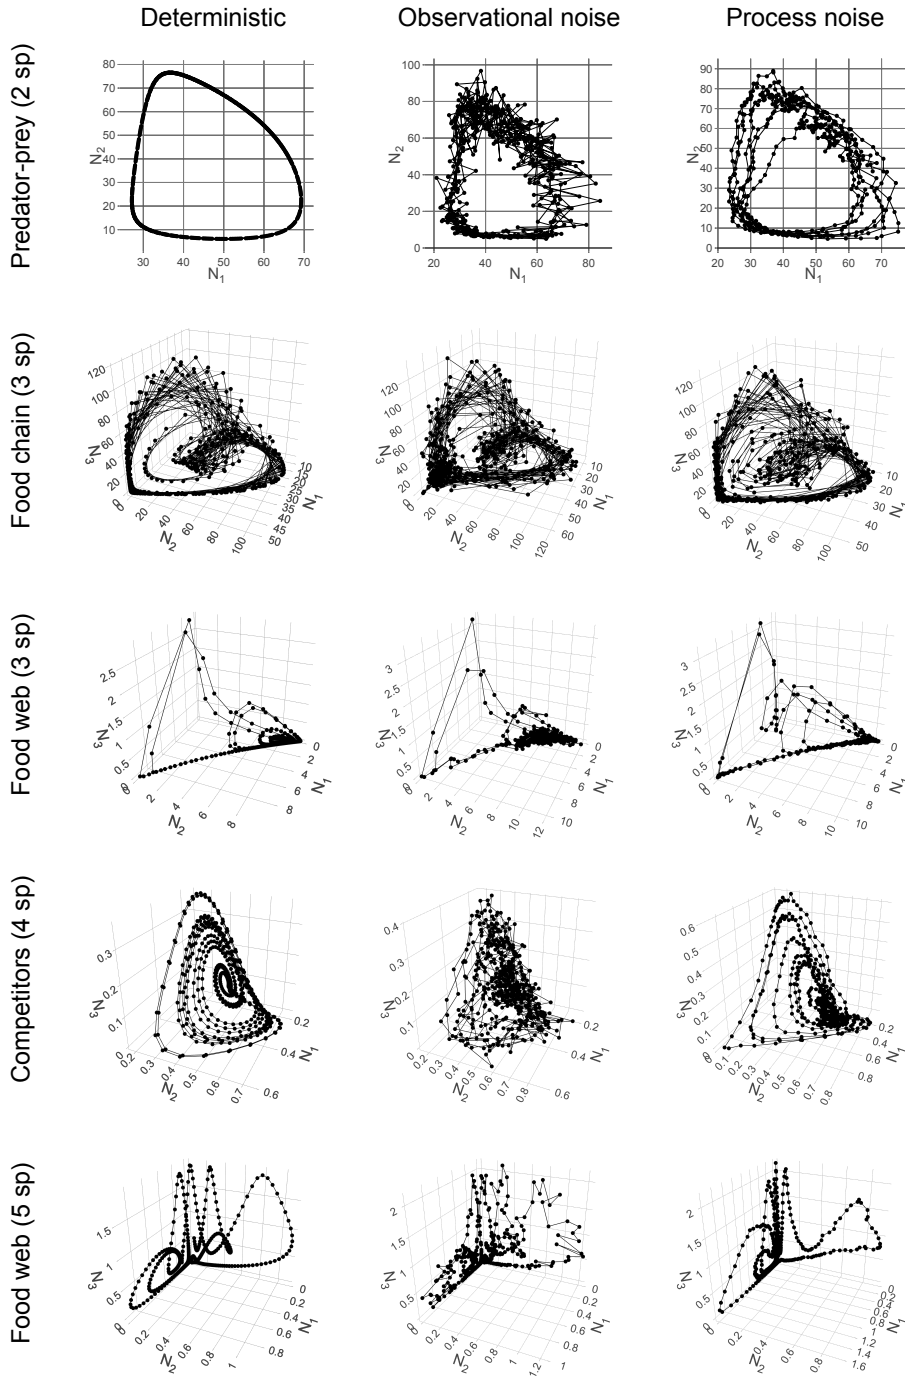

**Figure S5.** Attractors in state space corresponding to each multivariate synthetic time series generated from a population dynamics model (different rows; see *Section 3*) with a different type of noise (different columns; see *Section 6*). Each plot shows the 500 points  $(\{N(t)\}, t = 1, \dots, 500)$  generated by numerically integrating the indicated model and then sampling equidistant points. Note that we only show the abundances of species 1, 2, and 3 for models with more than 3 species.



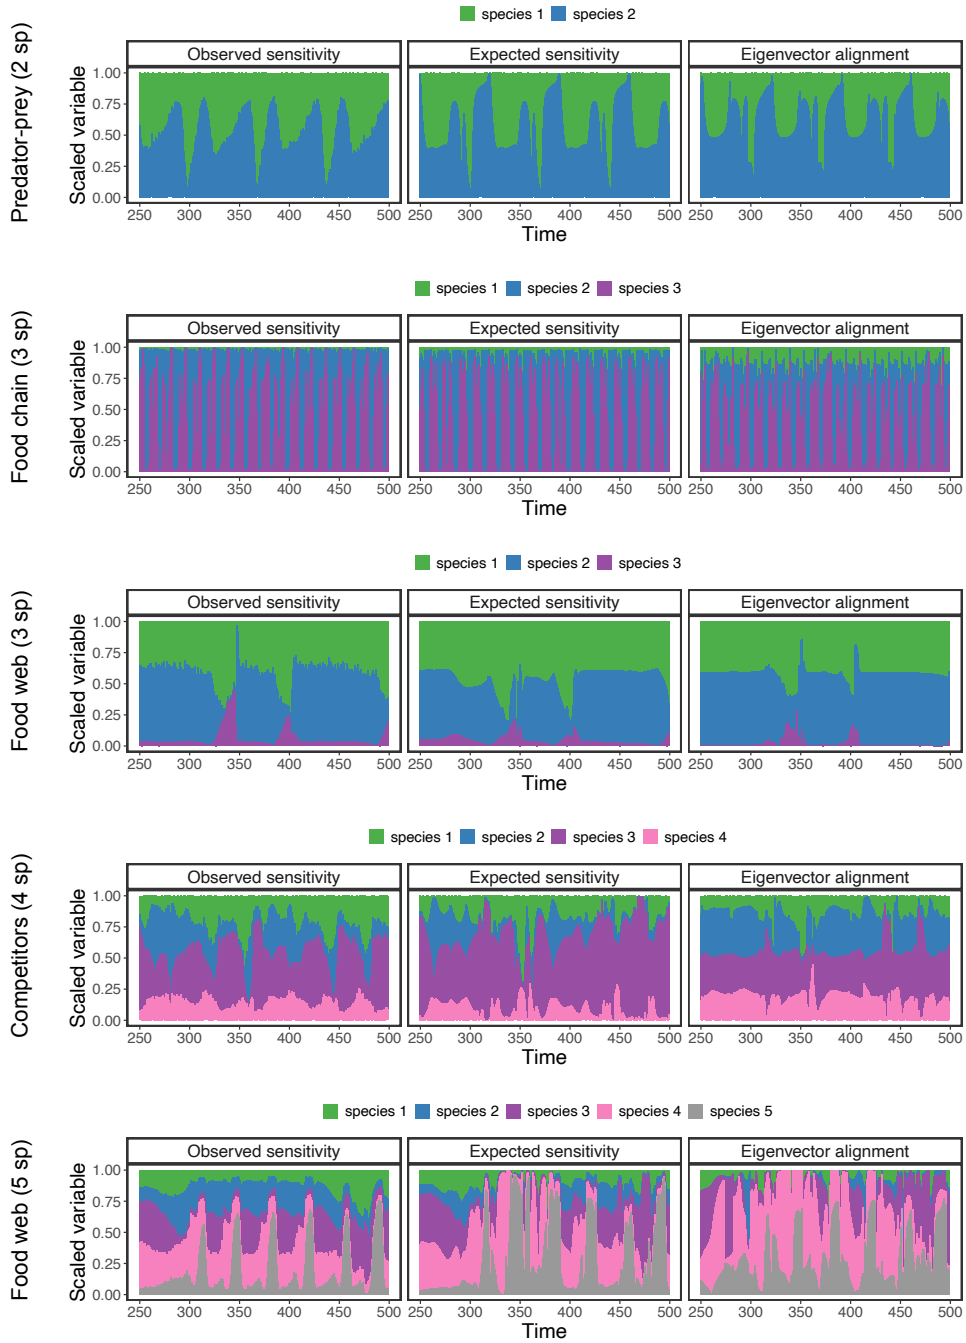

**Figure S6.** Species sensitivities computed from our perturbation analyses ( $\langle s_i \rangle$ ; first column) as well as expected sensitivities ( $\mathbb{E}(s_i)$ ; second column) and eigenvector alignments ( $|\mathbf{v}_{1i}|$ ; third column) inferred from each synthetic time series (different rows) with the S-map over time. A bar in one of the plots shows the values of the corresponding variable (i.e.,  $\langle s_i \rangle$ ,  $\mathbb{E}(s_i)$ , or  $|\mathbf{v}_{1i}|$ ) across species. Note that variables are rescaled to sum 1 across species to improve visualization but that this procedure does not change the rankings. These results correspond to our main set of analyses with synthetic time series shown in the main text (Fig. 3).

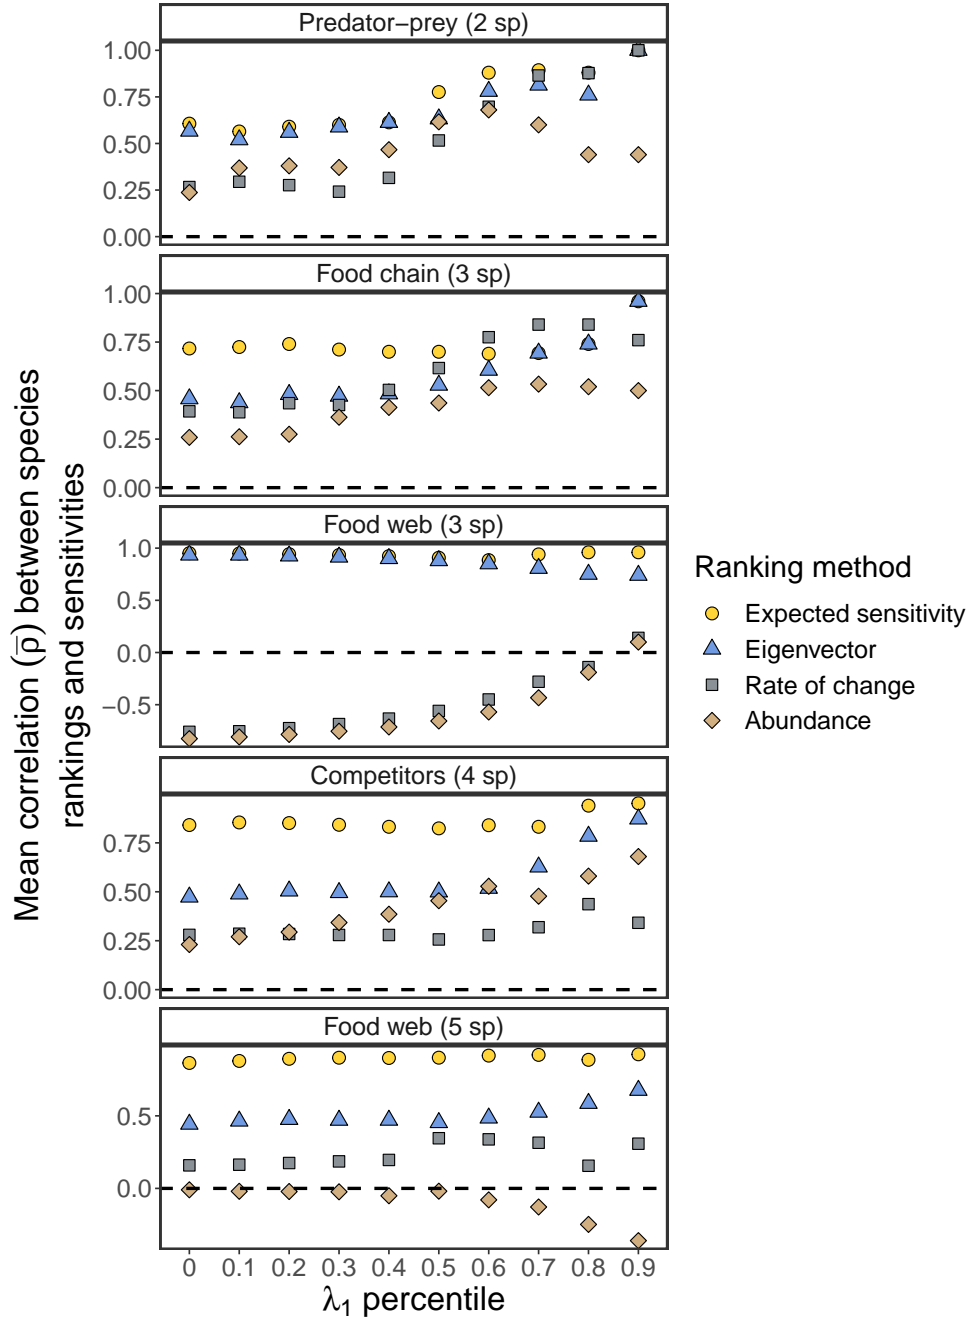

**Figure S7.** Mean Spearman's rank correlation over time ( $\bar{\rho}$ ) between species sensitivities to perturbation ( $\langle s_i \rangle$ ) and four different approaches (expected sensitivity,  $\mathbb{E}(s_i)$ ; eigenvector,  $|\mathbf{v}_{1i}|$ ; rate of change,  $\Delta N_i(t)$ ; and abundance,  $-N_i(t)$ ) as a function of the percentile of  $\lambda_1$  used to filter the time series. Each point represents the  $\bar{\rho}$  value obtained using a given ranking approach after removing time series points with a  $\lambda_1$  value lower than the indicated percentile of the  $\lambda_1$  distribution. The figure shows that, for most models, the expected sensitivity and eigenvector rankings (yellow circles and blue triangles) become more accurate (i.e., higher  $\bar{\rho}$ ) when we only use points with a high  $\lambda_1$ . Note that we compute  $\mathbb{E}(s_i)$ ,  $|\mathbf{v}_{1i}|$ , and  $\lambda_1$  analytically for this figure. Also note that the values of  $\bar{\rho}$  for the 0th percentile are exactly the same as the ones shown in Fig. 3A in the main text.

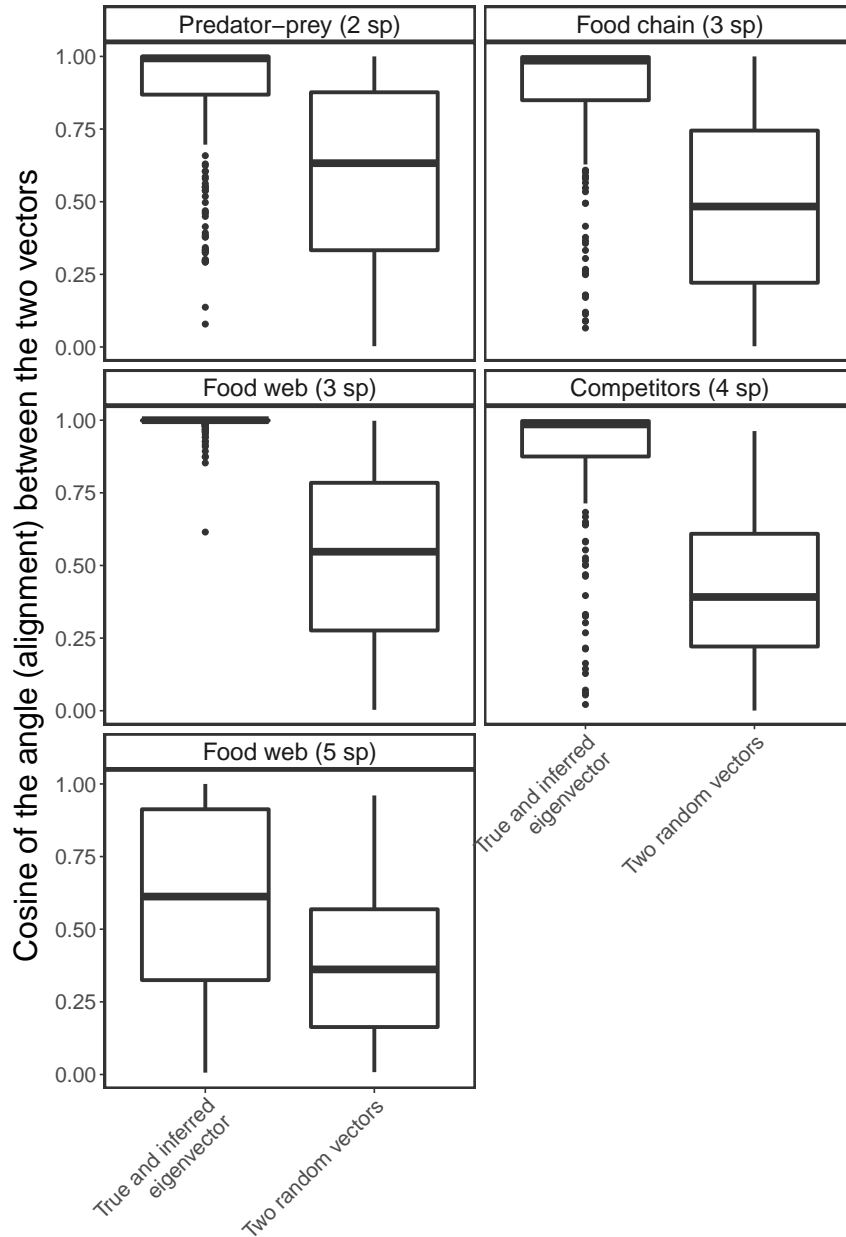

**Figure S8.** Alignments (i.e., absolute value of cosine of the angle) between  $\mathbf{v}_1$  inferred with the S-map and  $\mathbf{v}_1$  computed from the analytical Jacobian matrix (left boxplots) as well as alignments between two randomly sampled vectors (right boxplots) for each of the five population dynamics models. Each boxplot on the left shows the alignment values computed using the second half of each time series (i.e., last 250 points) for which the S-map was used to infer  $\mathbf{v}_1$  (see *Section 5*). Each boxplot on the right shows the alignment values computed using 250 pairs of vectors with random directions. The figure shows that  $\mathbf{v}_1$  inferred with the S-map is on average much more aligned with the analytical  $\mathbf{v}_1$  than what is expected if their directions are sampled at random.

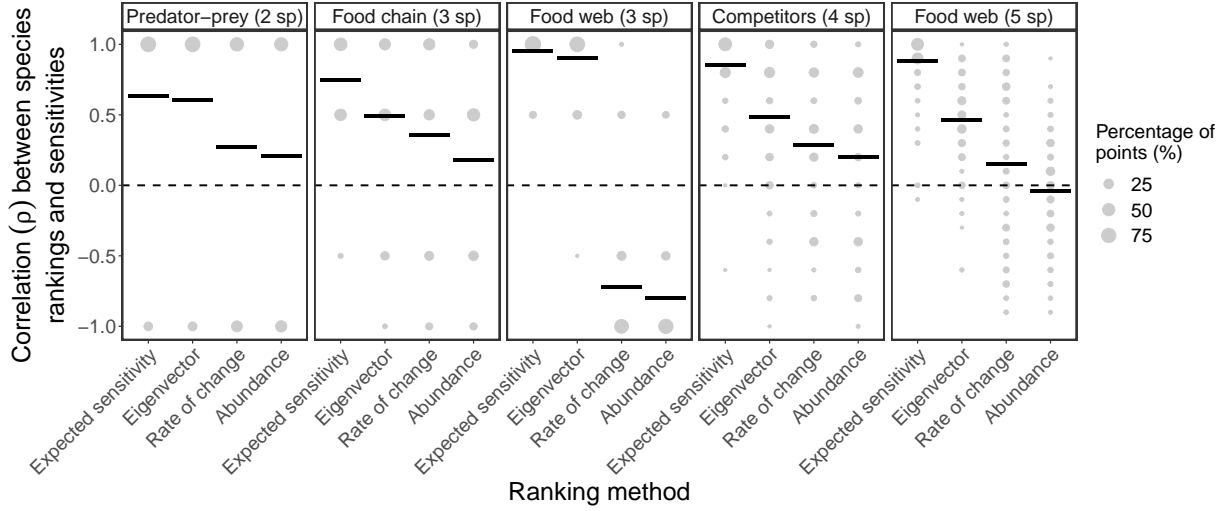

**Figure S9.** Same as Fig. 3A in the main text, but performing uniformly distributed perturbations instead of normally distributed perturbations (see *Section 4*). The figure shows the percentage of points with a given rank correlation value ( $\rho$ , size of gray points) and the average rank correlation ( $\bar{\rho}$ , horizontal lines) between species sensitivities to perturbations ( $\langle s_i \rangle$ ) and four different approaches (expected sensitivity,  $\mathbb{E}(s_i)$ ; eigenvector,  $|\mathbf{v}_{1i}|$ ; rate of change,  $\Delta N_i(t)$ ; and abundance,  $-N_i(t)$ ). Note that we compute  $\mathbb{E}(s_i)$  and  $|\mathbf{v}_{1i}|$  analytically for this figure. For this figure, perturbed abundances ( $\tilde{\mathbf{N}}$ ) are uniformly sampled inside a hypersphere of radius  $r$  centered in  $\mathbf{N}$ , where  $r$  corresponds to 15% of the mean standard deviation of species abundances.

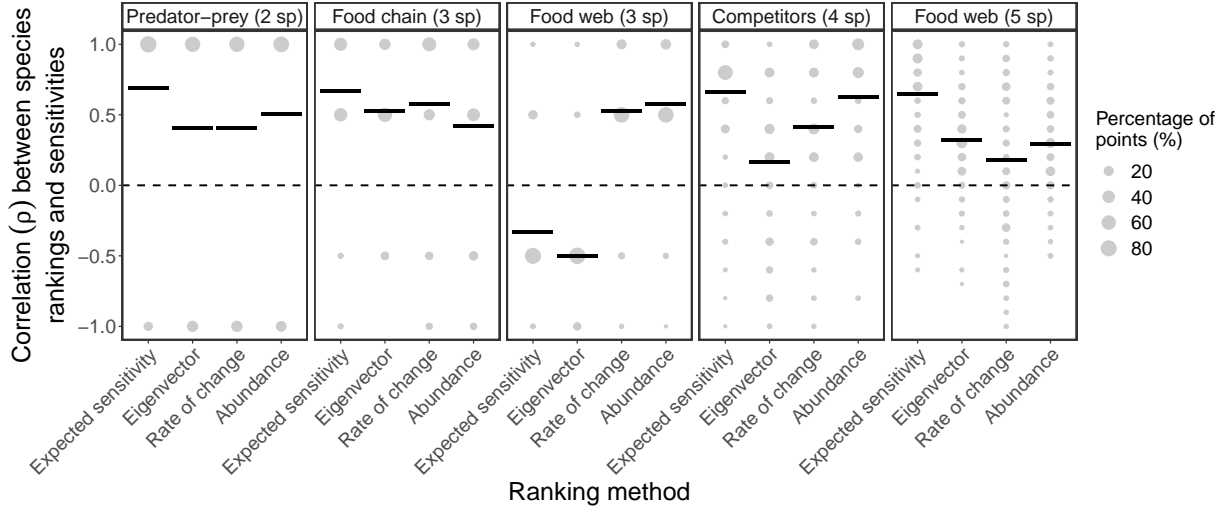

**Figure S10.** Same as Fig. 3A in the main text, but performing normally distributed perturbations with a variance proportional to relative species abundances instead of a fixed variance over time (see *Section 4*). The figure shows the percentage of points with a given rank correlation value ( $\rho$ , size of gray points) and the average rank correlation ( $\bar{\rho}$ , horizontal lines) between species sensitivities to perturbations ( $\langle s_i \rangle$ ) and four different approaches (expected sensitivity,  $\mathbb{E}(s_i)$ ; eigenvector,  $|\mathbf{v}_{1i}|$ ; rate of change,  $\Delta N_i(t)$ ; and abundance,  $-N_i(t)$ ). Note that we compute  $\mathbb{E}(s_i)$  and  $|\mathbf{v}_{1i}|$  analytically for this figure. For this figure, we sample perturbations to  $\mathbf{N}(t)$  as:  $p_i(t) \sim \mathcal{N}(\mu = 0, \sigma^2 = N_i'(t)r^2)$ , where  $N_i'(t) = \frac{N_i(t)}{\sum_{i=1}^S N_i(t)}$  and were  $r$  corresponds to 15% of the mean standard deviation of species abundances.

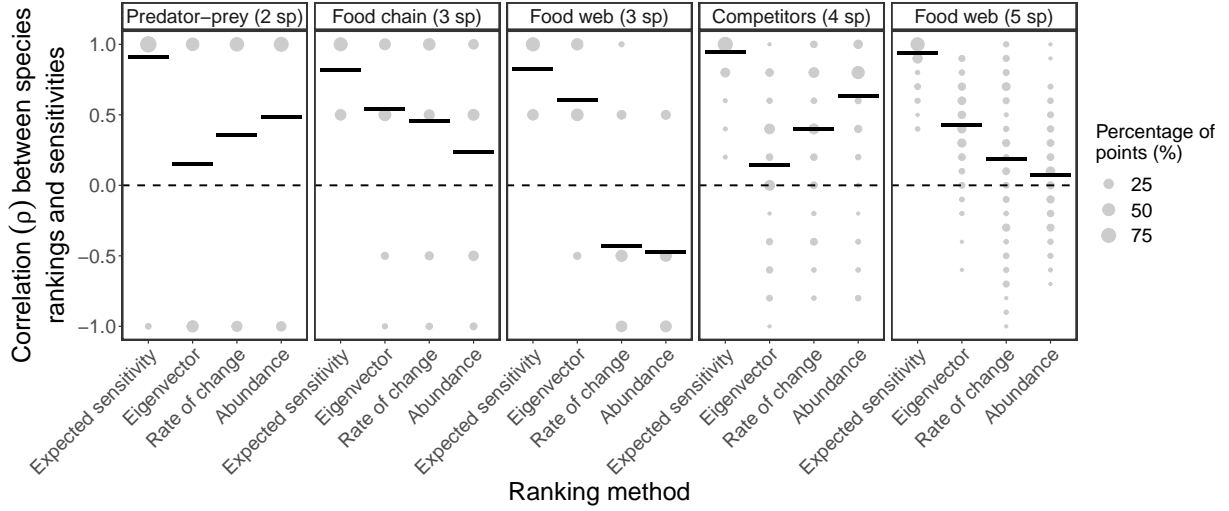

**Figure S11.** Same as Fig. 3A in the main text, but using  $k = 1$  as the time step to integrate perturbed and unperturbed abundances instead of  $k$  being inversely proportional to the mean absolute abundance percent change (see *Section 4*). The figure shows the percentage of points with a given rank correlation value ( $\rho$ , size of gray points) and the average rank correlation ( $\bar{\rho}$ , horizontal lines) between species sensitivities to perturbations ( $\langle s_i \rangle$ ) and four different approaches (expected sensitivity,  $\mathbb{E}(s_i)$ ; eigenvector,  $|\mathbf{v}_{1i}|$ ; rate of change,  $\Delta N_i(t)$ ; and abundance,  $-N_i(t)$ ). Note that we compute  $\mathbb{E}(s_i)$  and  $|\mathbf{v}_{1i}|$  analytically for this figure. For this figure, we numerically integrate every perturbed ( $\tilde{\mathbf{N}}(t)$ ) and unperturbed abundance ( $\mathbf{N}(t)$ ) for  $k = 1$  time step to compute  $\langle s_i \rangle$ .

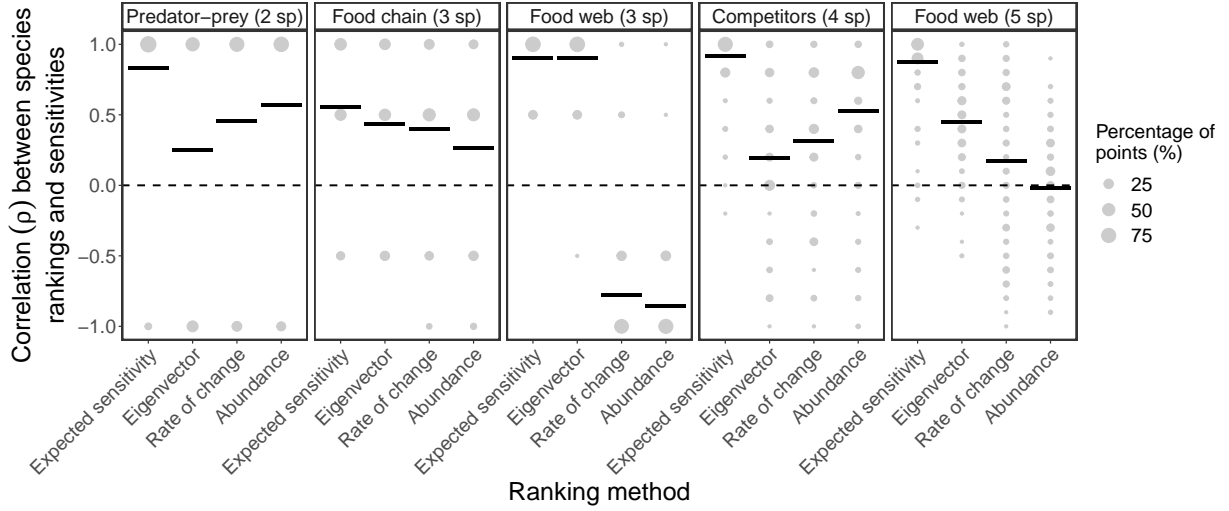

**Figure S12.** Same as Fig. 3A in the main text, but using  $k = 3$  as the time step to integrate perturbed and unperturbed abundances instead of  $k$  being inversely proportional to the mean absolute abundance percent change (see *Section 4*). The figure shows the percentage of points with a given rank correlation value ( $\rho$ , size of gray points) and the average rank correlation ( $\bar{\rho}$ , horizontal lines) between species sensitivities to perturbations ( $\langle s_i \rangle$ ) and four different approaches (expected sensitivity,  $\mathbb{E}(s_i)$ ; eigenvector,  $|\mathbf{v}_{1i}|$ ; rate of change,  $\Delta N_i(t)$ ; and abundance,  $-N_i(t)$ ). Note that we compute  $\mathbb{E}(s_i)$  and  $|\mathbf{v}_{1i}|$  analytically for this figure. For this figure, we numerically integrate every perturbed ( $\tilde{\mathbf{N}}(t)$ ) and unperturbed abundance ( $\mathbf{N}(t)$ ) for  $k = 3$  time steps to compute  $\langle s_i \rangle$ .

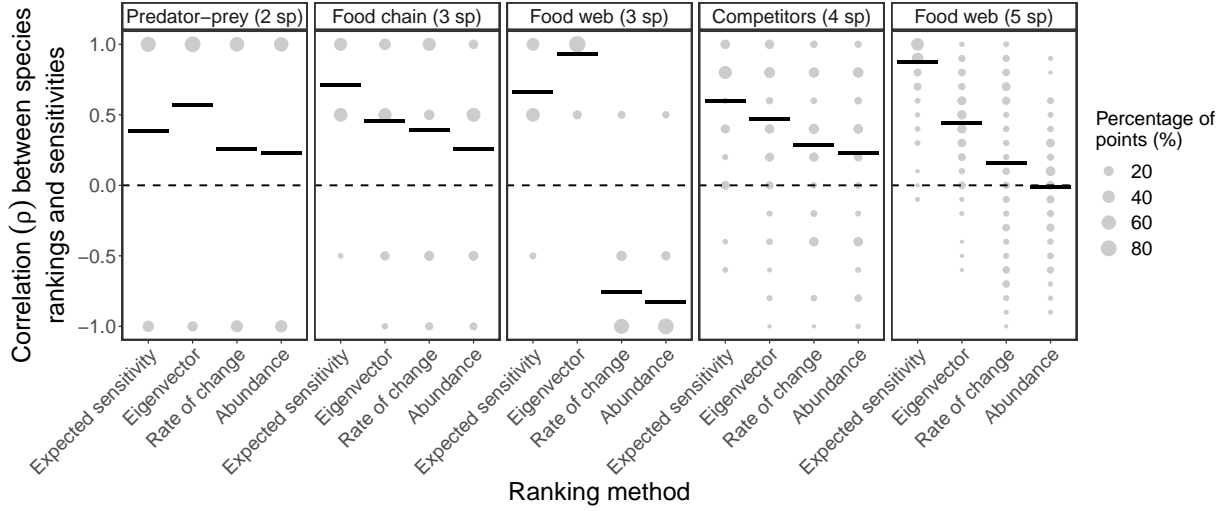

**Figure S13.** Same as Fig. 3A in the main text, but using  $k = 1$  as the time step to compute expected sensitivities ( $\mathbb{E}(s_i)$ ) when the true time step used to integrate perturbed and unperturbed abundances is inversely proportional to the mean absolute abundance percent change (see *Section 2*). The figure shows the percentage of points with a given rank correlation value ( $\rho$ , size of gray points) and the average rank correlation ( $\bar{\rho}$ , horizontal lines) between species sensitivities to perturbations ( $\langle s_i \rangle$ ) and four different approaches (expected sensitivity,  $\mathbb{E}(s_i)$ ; eigenvector,  $|\mathbf{v}_{1i}|$ ; rate of change,  $\Delta N_i(t)$ ; and abundance,  $-N_i(t)$ ). Note that we compute  $\mathbb{E}(s_i)$  and  $|\mathbf{v}_{1i}|$  analytically for this figure. For this figure, we numerically integrate every perturbed ( $\hat{\mathbf{N}}(t)$ ) and unperturbed abundance ( $\mathbf{N}(t)$ ) for a time step  $k$  that depends on the local time scale of the dynamics, but always compute  $\mathbb{E}(s_i)$  using  $k = 1$ .



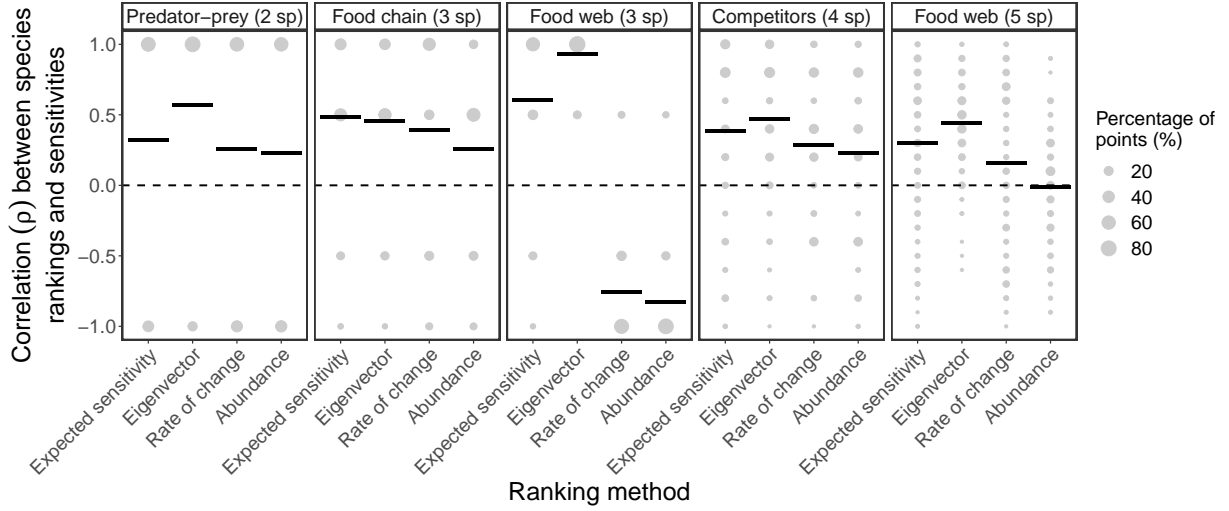

**Figure S14.** Same as Fig. 3A in the main text, but adding a normally distributed noise to  $k$  and  $\Sigma_t$  at each point in time to compute expected sensitivities ( $\mathbb{E}(s_i)$ ; see *Section 2*). The figure shows the percentage of points with a given rank correlation value ( $\rho$ , size of gray points) and the average rank correlation ( $\bar{\rho}$ , horizontal lines) between species sensitivities to perturbations ( $(s_i)$ ) and four different approaches (expected sensitivity,  $\mathbb{E}(s_i)$ ; eigenvector,  $|\mathbf{v}_{1i}|$ ; rate of change,  $\Delta N_i(t)$ ; and abundance,  $-N_i(t)$ ). Note that we compute  $\mathbb{E}(s_i)$  and  $|\mathbf{v}_{1i}|$  analytically for this figure. For this figure, we perform the same perturbation analyses as described for Fig. 3 (see *Section 4*), but add 100% of a normally distributed noise to the true value of  $k$  and to  $\Sigma_t = \mathbf{I}$  before computing  $\mathbb{E}(s_i)$ .

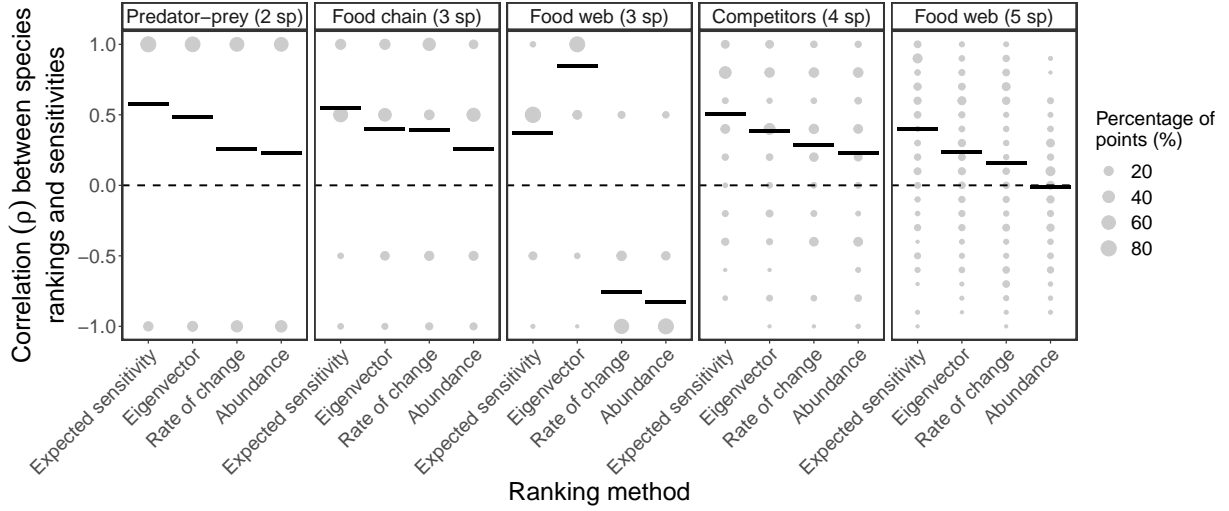

**Figure S15.** Same as Fig. 3B in the main text, but normalizing the abundances of each species  $i$  ( $N_i(t)$ ) in the training set to mean zero and unit standard deviation before performing the S-map. The figure shows the percentage of points with a given rank correlation value ( $\rho$ , size of gray points) and the average rank correlation ( $\bar{\rho}$ , horizontal lines) between species sensitivities to perturbations ( $\langle s_i \rangle$ ) and four different approaches (expected sensitivity,  $\mathbb{E}(s_i)$ ; eigenvector,  $|\mathbf{v}_{1i}|$ ; rate of change,  $\Delta N_i(t)$ ; and abundance,  $-N_i(t)$ ). Note that we infer the Jacobian matrix with the S-map using a moving training set in order to compute  $\mathbb{E}(s_i)$  and  $|\mathbf{v}_{1i}|$  for this figure.

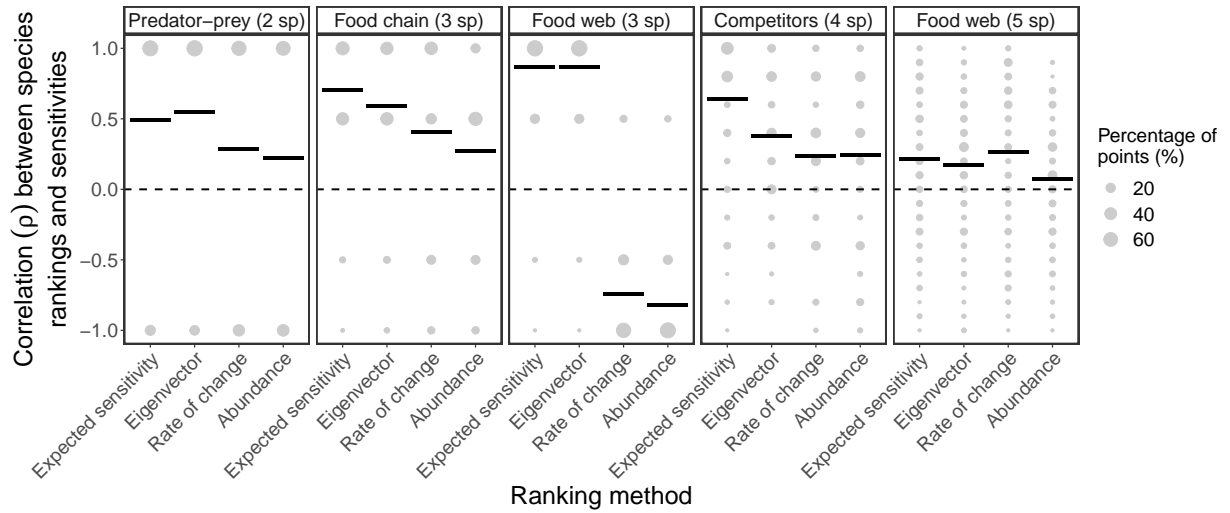

**Figure S16.** Same as Fig. 3B in the main text, but using a shorter training set with 100 instead of 250 points to perform the S-map (see *Section 6*). The figure shows the percentage of points with a given rank correlation value ( $\rho$ , size of gray points) and the average rank correlation ( $\bar{\rho}$ , horizontal lines) between species sensitivities to perturbations ( $\langle s_i \rangle$ ) and four different approaches (expected sensitivity,  $\mathbb{E}(s_i)$ ; eigenvector,  $|\mathbf{v}_{1i}|$ ; rate of change,  $\Delta N_i(t)$ ; and abundance,  $-N_i(t)$ ). Note that we infer the Jacobian matrix with the S-map using a moving training set in order to compute  $\mathbb{E}(s_i)$  and  $|\mathbf{v}_{1i}|$  for this figure.

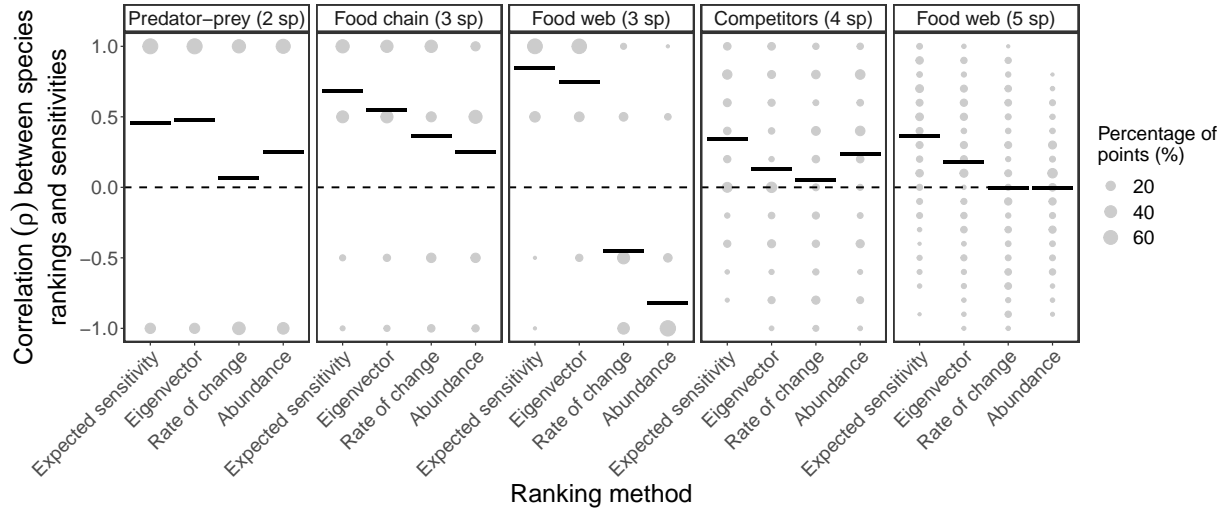

**Figure S17.** Same as Fig. 3B in the main text, but adding 10% of observational noise to the training set before performing the S-map (see *Section 6*). The figure shows the percentage of points with a given rank correlation value ( $\rho$ , size of gray points) and the average rank correlation ( $\bar{\rho}$ , horizontal lines) between species sensitivities to perturbations ( $\langle s_i \rangle$ ) and four different approaches (expected sensitivity,  $\mathbb{E}(s_i)$ ; eigenvector,  $|\mathbf{v}_{1i}|$ ; rate of change,  $\Delta N_i(t)$ ; and abundance,  $-N_i(t)$ ). Note that we infer the Jacobian matrix with the S-map using a moving training set in order to compute  $\mathbb{E}(s_i)$  and  $|\mathbf{v}_{1i}|$  for this figure.

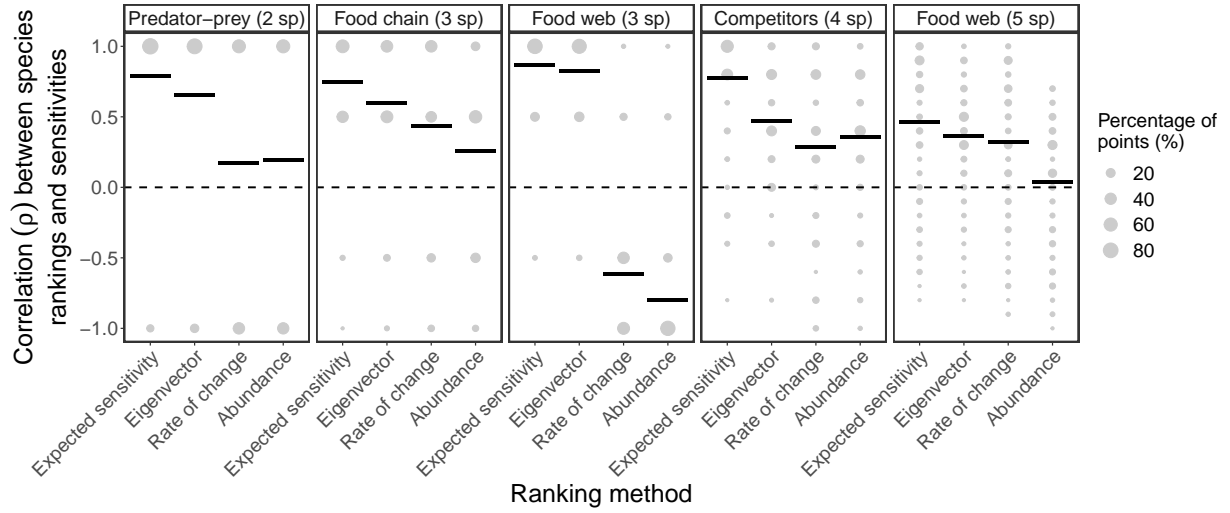

**Figure S18.** Same as Fig. 3B in the main text, but generating each synthetic time series with the population dynamics model containing stochasticity (i.e., process noise; see *Section 6*). The figure shows the percentage of points with a given rank correlation value ( $\rho$ , size of gray points) and the average rank correlation ( $\bar{\rho}$ , horizontal lines) between species sensitivities to perturbations ( $\langle s_i \rangle$ ) and four different approaches (expected sensitivity,  $\mathbb{E}(s_i)$ ; eigenvector,  $|\mathbf{v}_{1i}|$ ; rate of change,  $\Delta N_i(t)$ ; and abundance,  $-N_i(t)$ ). Note that we infer the Jacobian matrix with the S-map using a moving training set in order to compute  $\mathbb{E}(s_i)$  and  $|\mathbf{v}_{1i}|$  for this figure.

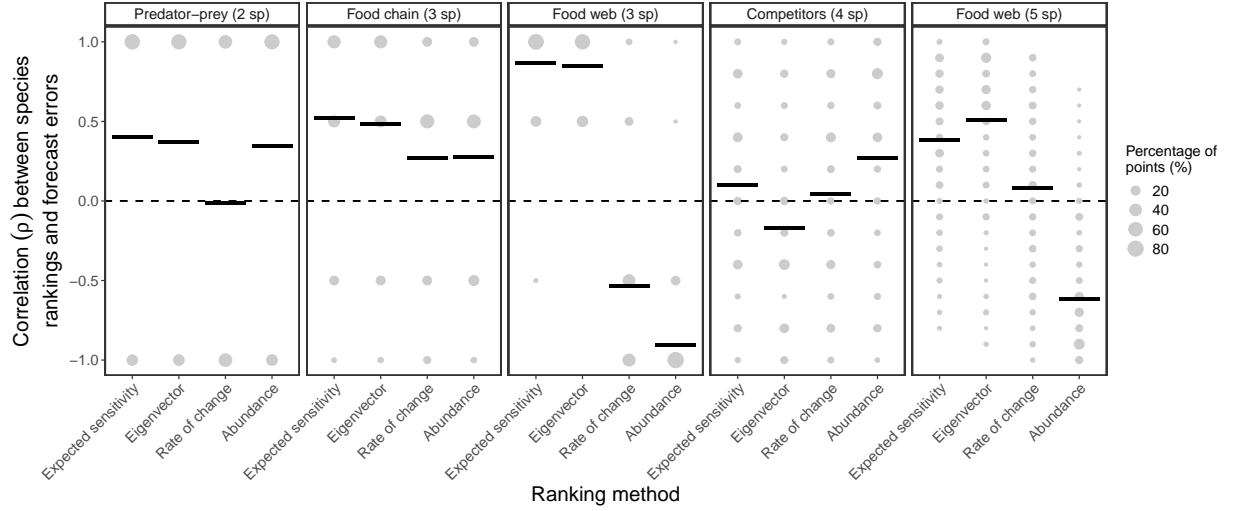

**Figure S19.** Similar to Fig. 3B in the main text, but here we compute the Spearman's rank correlation ( $\rho$ ) between species average forecast errors under perturbations ( $\bar{\epsilon}_i$ ; see *Section 8*) and the four ranking approaches (expected sensitivity,  $\mathbb{E}(s_i)$ ; eigenvector,  $|\mathbf{v}_{1i}|$ ; rate of change,  $\Delta N_i(t)$ ; and abundance,  $-N_i(t)$ ). The figure shows the percentage of points with a given  $\rho$  value (size of gray points) and the average rank correlation ( $\bar{\rho}$ , horizontal lines). Note that we infer the Jacobian matrix with the S-map using a moving training set in order to compute  $\mathbb{E}(s_i)$  and  $|\mathbf{v}_{1i}|$  for this figure. This figure illustrates our hypothesis that species that are more sensitive to perturbations (i.e., high  $\mathbb{E}(s_i)$  or  $|\mathbf{v}_{1i}|$ ) tend to be harder to forecast under perturbations (i.e., high  $\bar{\epsilon}_i$ ).

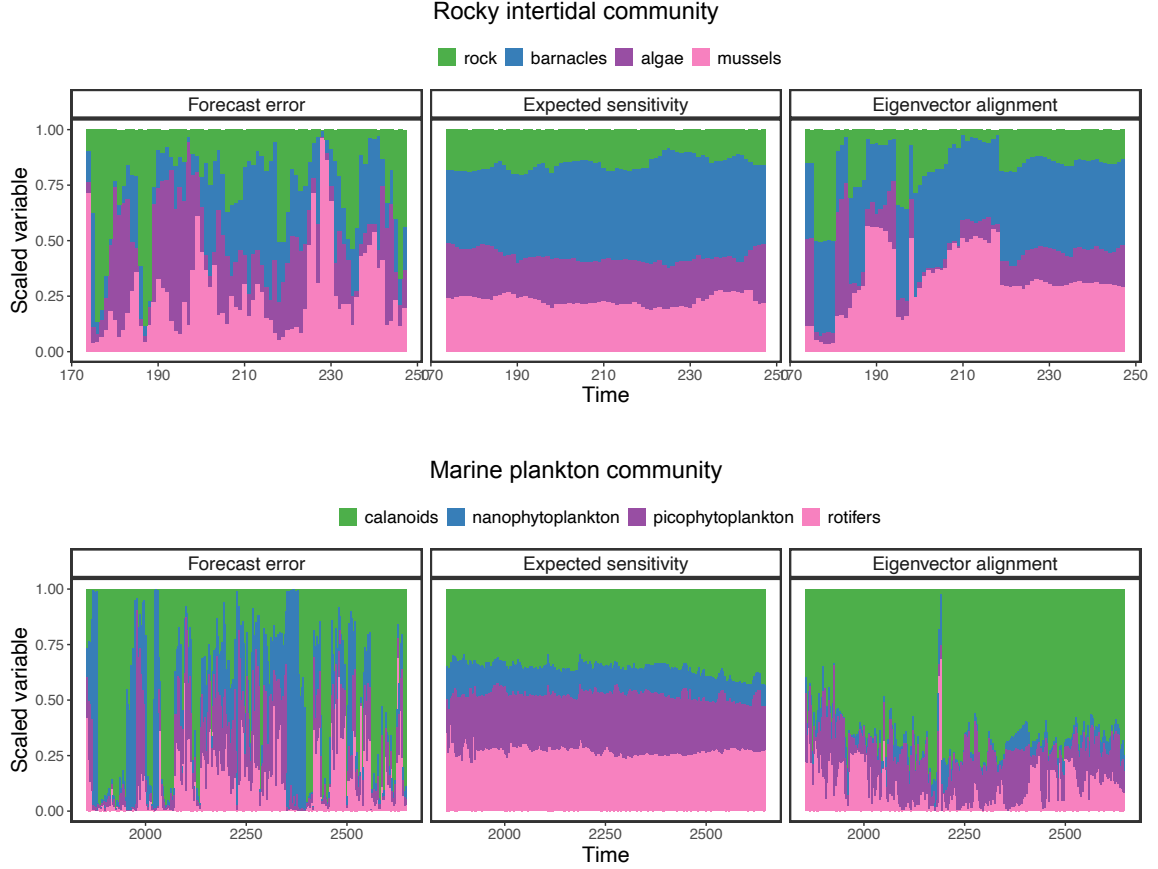

**Figure S20.** Species standardized forecast root-mean-square error computed from our forecast analyses ( $\epsilon_i$ ; first column; see *Section 7*) as well as expected sensitivities ( $\mathbb{E}(s_i)$ ; second column) and eigenvector alignments ( $|\mathbf{v}_{1i}|$ ; third column) inferred from each empirical time series (different rows) with the S-map over time. A bar in one of the plots shows the values of the corresponding variable (i.e.,  $\epsilon_i$ ,  $\mathbb{E}(s_i)$ , or  $|\mathbf{v}_{1i}|$ ) across species. Note that variables are rescaled to sum 1 across species to improve visualization but that this procedure does not change the rankings. These results correspond to our main set of analyses with empirical time series shown in the main text (Fig. 4).

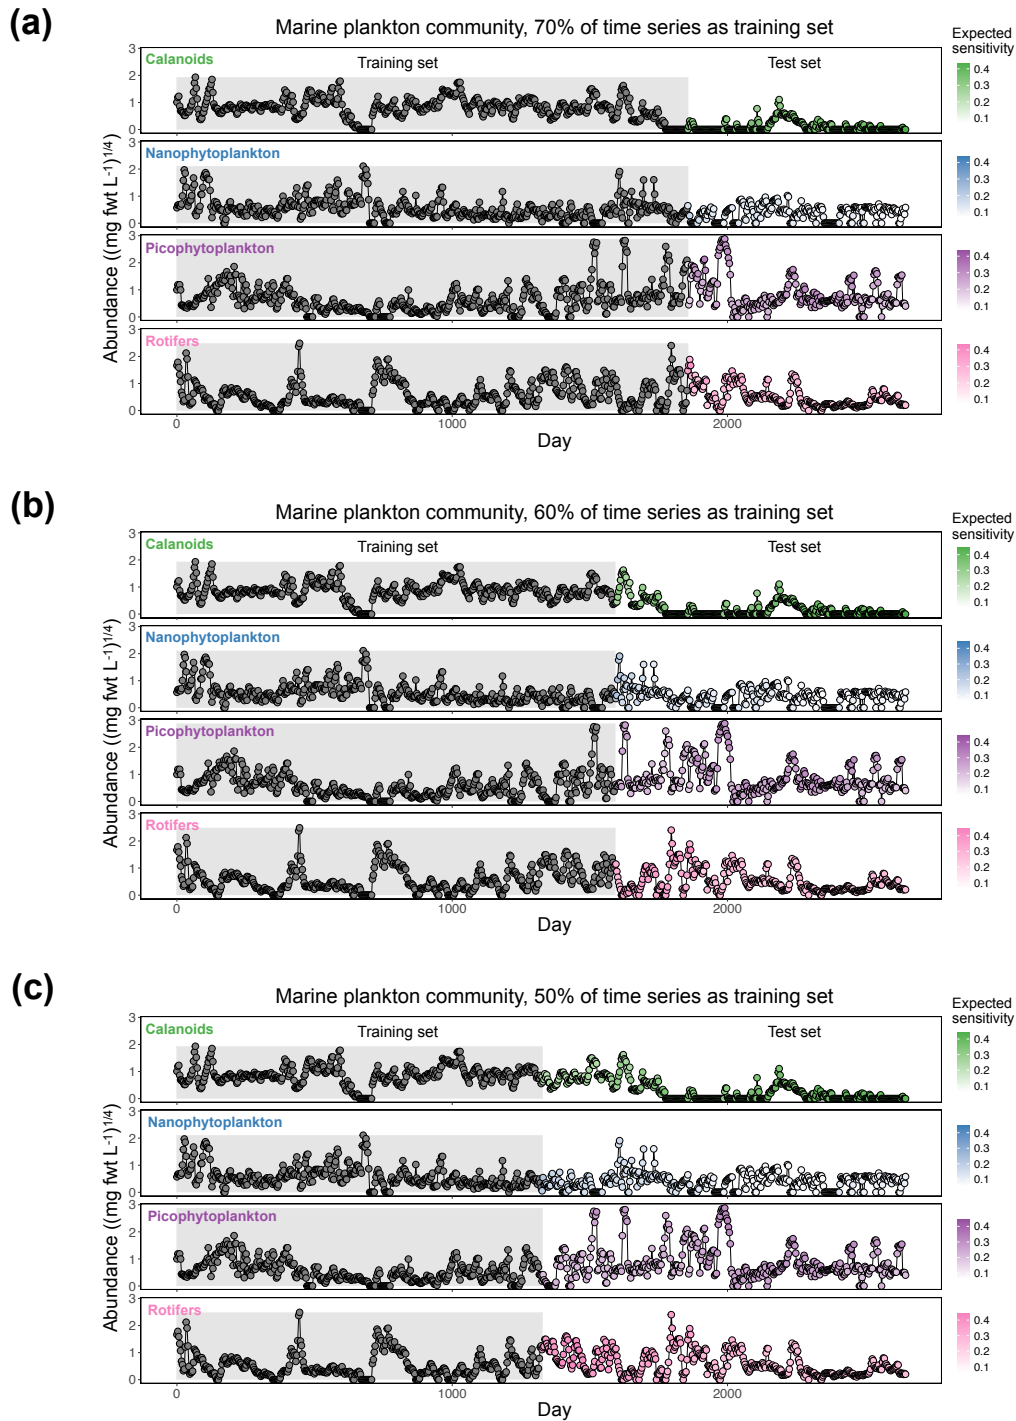

**Figure S21.** Same as Fig. 4A in the main text but for the empirical time series of marine plankton species (Benincà *et al.*, 2009) (see *Section 7*). Each panel shows the time series of the abundance of a given species with points colored according to their expected sensitivity value ( $\mathbb{E}(s_i)$ ). We infer  $\mathbb{E}(s_i)$  at the last point in the training set with the S-map trained on a moving training set (gray region) containing (a) 70%, (b) 60%, or (c) 50% of the whole time series. In general, calanoids are the most sensitive species followed by rotifers or picocyanobacteria depending on the point in time.



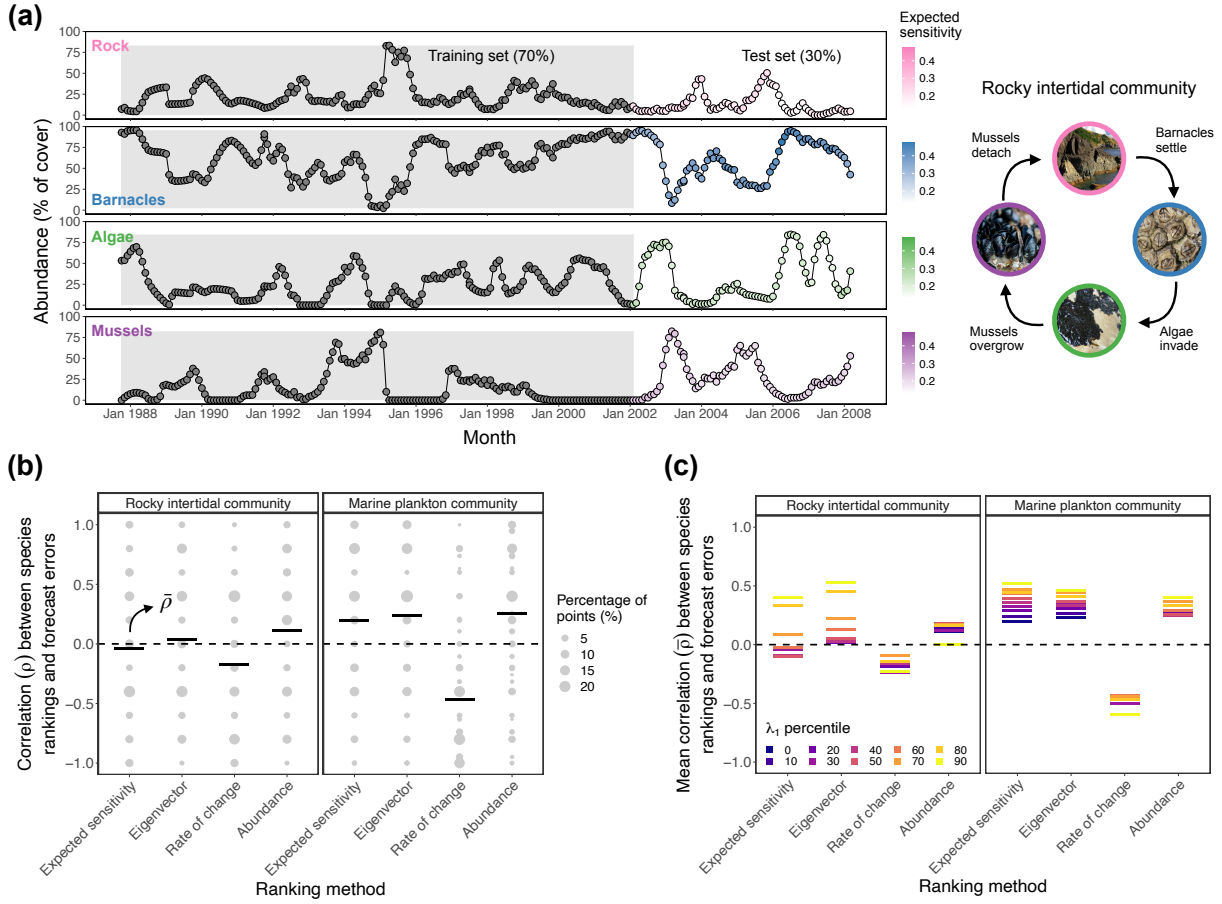

**Figure S22.** Same as Fig. 4 in the main text but using  $\tau = 2$  steps ahead to forecast species abundances and compute forecast errors ( $\epsilon_i$ ) instead of  $\tau = 3$  (see Section 7). Note that here we use  $k = 2$  instead of  $k = 3$  to compute expected sensitivities ( $\mathbb{E}(s_i)$ ). (a) Time series of a rocky intertidal community containing four species with point color depicting their expected sensitivity value. (b) Rank correlation ( $\rho$ ) between  $\epsilon_i$  and four different approaches (expected sensitivity,  $\mathbb{E}(s_i)$ ; eigenvector,  $|\mathbf{v}_{1i}|$ ; rate of change,  $\Delta N_i(t)$ ; and abundance,  $-N_i(t)$ ). Each panel shows the percentage of points with a given  $\rho$  value (size of gray points) and the average of these values across the test set ( $\bar{\rho}$ , horizontal lines) for a given empirical time series. (c) Average correlation ( $\bar{\rho}$ ) between  $\epsilon_i$  and the different ranking approaches computed for points in the test set that have a  $\lambda_1$  value higher than a given percentile of the  $\lambda_1$  distribution.

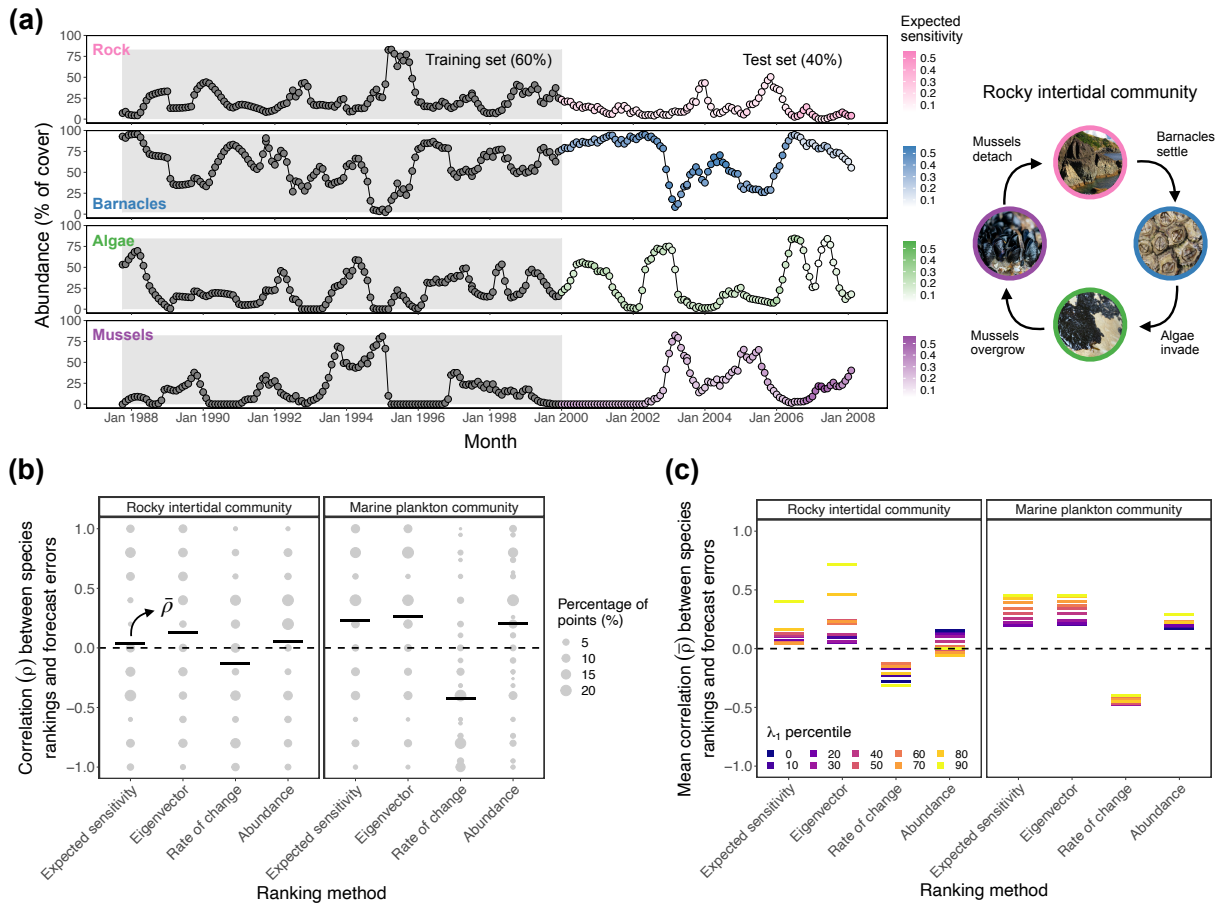

**Figure S23.** Same as Fig. 4 in the main text but using 60% instead of 70% of the each empirical time series as the moving training set (gray region in (a); see Section 7). (a) Time series of a rocky intertidal community containing four species with point color depicting their expected sensitivity value ( $\mathbb{E}(s_i)$ ). (b) Rank correlation ( $\rho$ ) between  $\epsilon_i$  and four different approaches (expected sensitivity,  $\mathbb{E}(s_i)$ ; eigenvector,  $|\mathbf{v}_{1i}|$ ; rate of change,  $\Delta N_i(t)$ ; and abundance,  $-N_i(t)$ ). Each panel shows the percentage of points with a given  $\rho$  value (size of gray points) and the average of these values across the test set ( $\bar{\rho}$ , horizontal lines) for a given empirical time series. (c) Average correlation ( $\bar{\rho}$ ) between  $\epsilon_i$  and the different ranking approaches computed for points in the test set that have a  $\lambda_1$  value higher than a given percentile of the  $\lambda_1$  distribution.

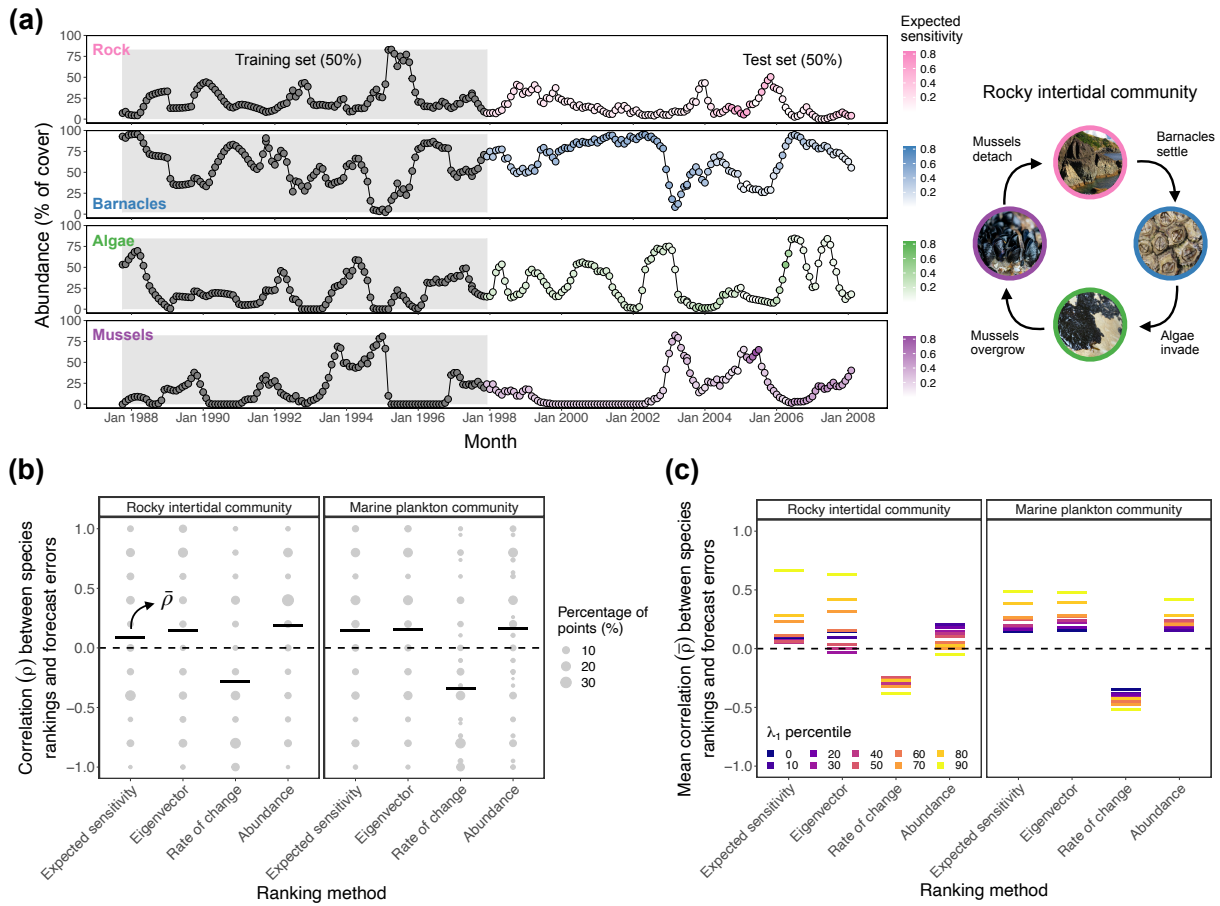

**Figure S24.** Same as Fig. 4 in the main text but using 50% instead of 70% of the each empirical time series as the moving training set (gray region in (a); see *Section 7*). (a) Time series of a rocky intertidal community containing four species with point color depicting their expected sensitivity value ( $\mathbb{E}(s_i)$ ). (b) Rank correlation ( $\rho$ ) between  $\epsilon_i$  and four different approaches (expected sensitivity,  $\mathbb{E}(s_i)$ ; eigenvector,  $|\mathbf{v}_{1i}|$ ; rate of change,  $\Delta N_i(t)$ ; and abundance,  $-N_i(t)$ ). Each panel shows the percentage of points with a given  $\rho$  value (size of gray points) and the average of these values across the test set ( $\bar{\rho}$ , horizontal lines) for a given empirical time series. (c) Average correlation ( $\bar{\rho}$ ) between  $\epsilon_i$  and the different ranking approaches computed for points in the test set that have a  $\lambda_1$  value higher than a given percentile of the  $\lambda_1$  distribution.

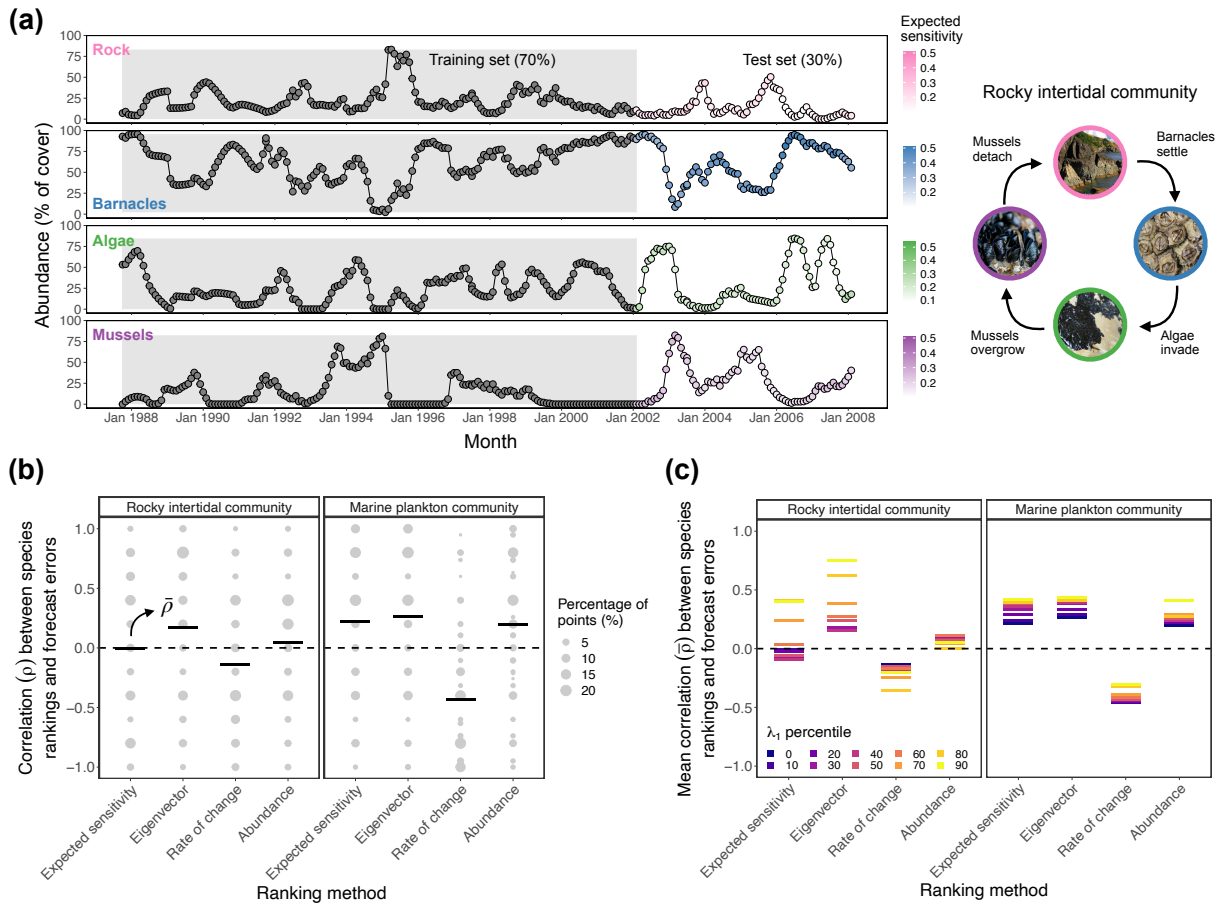

**Figure S25.** Same as Fig. 4 in the main text but normalizing the abundances of each species  $i$  ( $N_i(t)$ ) in the training set to mean zero and unit standard deviation before performing the S-map (see Section 7). Note that we always normalize abundances before the forecast analyses (i.e., LSTM neural network). (a) Time series of a rocky intertidal community containing four species with point color depicting their expected sensitivity value ( $\mathbb{E}(s_i)$ ). (b) Rank correlation ( $\rho$ ) between  $\epsilon_i$  and four different approaches (expected sensitivity,  $\mathbb{E}(s_i)$ ; eigenvector,  $|\mathbf{v}_{1i}|$ ; rate of change,  $\Delta N_i(t)$ ; and abundance,  $-N_i(t)$ ). Each panel shows the percentage of points with a given  $\rho$  value (size of gray points) and the average of these values across the test set ( $\bar{\rho}$ , horizontal lines) for a given empirical time series. (c) Average correlation ( $\bar{\rho}$ ) between  $\epsilon_i$  and the different ranking approaches computed for points in the test set that have a  $\lambda_1$  value higher than a given percentile of the  $\lambda_1$  distribution.
